# Supplementary material for: Differential proteome response to H5N1 highly pathogenic avian influenza (HPAI) viruses infection in duck
Source: Front Immunol. 2022 Aug 19;13:965454. doi: 10.3389/fimmu.2022.965454 (PMC9438030; doi:10.3389/fimmu.2022.965454)
Supplement: Supplementary file 3 [file Table_2.xlsx]

## Sheet: Parameter
© 2000-2014 QIAGEN. All rights reserved.
Reference set: Ingenuity Knowledge Base (Genes + Endogenous Chemicals)
Relationship to include: Direct and Indirect
Does not Include Endogenous Chemicals
Optional Analyses: My Pathways My List
Filter Summary:
Consider only relationships where
confidence = Experimentally Observed OR High (predicted)

## Sheet: Bio Functions
Bio Functions
Categories	Diseases or Functions Annotation	p-Value	Predicted Activation State	Activation z-score	Notes	Molecules	# Molecules
Cellular Movement	cell movement	3.21E-03	Increased	3.635		ACSL4,ADA,AHSG,ARPC2,CAP1,CD36,CDC42,CLU,CORO1C,CTTN,DMBT1,DSTN,FBLN5,FSTL1,FTH1,ITGB2,LAMC2,LGALS8,LYN,MIF,MYO1F,NCF1,NCKIPSD,NDRG1,PON2,PTPRM,RAB5A,RNF20,S100A6,SEMA3C,SERPINA1,SERPINH1,SMARCA4,SOD1,STAT1,STMN1,THBS1,THY1,TLN1,VDAC3,YWHAZ	41
Cellular Movement	migration of cells	8.50E-03	Increased	3.118		ACSL4,ADA,AHSG,CAP1,CD36,CDC42,CLU,CORO1C,CTTN,DMBT1,FBLN5,FSTL1,FTH1,ITGB2,LAMC2,LYN,MIF,MYO1F,NCF1,NCKIPSD,NDRG1,PON2,PTPRM,RAB5A,RNF20,S100A6,SEMA3C,SERPINA1,SMARCA4,SOD1,STAT1,STMN1,THBS1,THY1,TLN1,YWHAZ	36
Infectious Disease	Viral Infection	1.00E-02	Increased	2.53	bias	ADA,ADK,ARPC3,ATOX1,ATP5B,CD36,CDC42,CLU,DMBT1,FUBP1,G3BP1,HNRNPU,ITGB2,MIF,MYO1F,NCF1,NUP50,PSMD14,RAB5A,RBM17,RBM25,RNPS1,RPS5,SERPINA1,SLCO2A1,STAT1,STAU1,SUB1,TALDO1,THAP11,THOC2,TRIM25	32
Cellular Development, Hematopoiesis	maturation of dendritic cells	2.78E-03	Increased	2.393		CD36,ITGB2,LYN,SERPINA1,STAT1,THBS1	6
Infectious Disease	infection of cells	2.36E-03	Increased	2.063	bias	ARPC3,ATOX1,ATP5B,CDC42,G3BP1,HNRNPU,MYO1F,NUP50,RAB5A,RBM17,RBM25,RNPS1,SEMA7A,SERPINA1,SLCO2A1,STAT1,STAU1,SUB1,THAP11,THOC2	20
Cell-To-Cell Signaling and Interaction, Inflammatory Response	immune response of macrophages	1.77E-02	Increased	2		CD36,ITGB2,LYN,MIF,THBS1	5
Infectious Disease	infection by Flaviviridae	1.71E-03	Increased	2	bias	ARPC3,G3BP1,RAB5A,STAT1,STAU1	5
Cardiovascular System Development and Function, Cellular Movement	chemotaxis of endothelial cells	1.51E-03	Increased	1.941	bias	CD36,CDC42,MIF,THBS1	4
Cell-To-Cell Signaling and Interaction, Hematological System Development and Function, Inflammatory Response	immune response of neutrophils	9.32E-03	Decreased	-1.728		CD36,ITGB2,LYN,THBS1	4
Cell-To-Cell Signaling and Interaction, Cellular Assembly and Organization, Cellular Function and Maintenance, Tissue Development	formation of focal adhesions	2.78E-03	Increased	1.724		CDC42,CTTN,RBBP4,STMN1,THBS1,THY1	6
Cardiovascular System Development and Function, Cell-To-Cell Signaling and Interaction, Tissue Development	cell-cell adhesion of endothelial cells	3.17E-05	Increased	1.715		CDC42,ITGB2,LGALS8,THY1	4
Cellular Assembly and Organization, Cellular Function and Maintenance, Tissue Development	formation of actin filaments	4.51E-03	Increased	1.698		ARPC2,CDC42,CTTN,DSTN,MIF,NCKIPSD,RBBP4,SMARCA4,THY1	9
Infectious Disease	infection by RNA virus	2.67E-03	Increased	1.678	bias	ADK,ARPC3,ATOX1,ATP5B,CLU,G3BP1,HNRNPU,ITGB2,MYO1F,NUP50,RAB5A,RBM17,RBM25,RNPS1,SERPINA1,SLCO2A1,STAT1,STAU1,SUB1,THAP11,THOC2	21
Cell-To-Cell Signaling and Interaction, Hematological System Development and Function, Immune Cell Trafficking, Inflammatory Response, Tissue Development	adhesion of phagocytes	9.29E-04	Increased	1.635	bias	CTTN,ITGB2,LYN,MIF,SERPINA1,THY1,TLN1	7
Cellular Assembly and Organization	quantity of filaments	2.27E-03	Decreased	-1.597		CDC42,CLU,ITGB2,RBBP4,SERPINH1,STMN1	6
Cell Morphology	size of cells	1.31E-02	Decreased	-1.555		ADA,BHMT,CAP1,CDC42,DSTN,LYN,MYH6,PON2,RBBP4,SMARCA4	10
Cellular Assembly and Organization, Tissue Development	formation of filaments	2.25E-04	Increased	1.555		ARPC2,CDC42,CLU,CTTN,DCTN1,DSTN,GDA,MIF,NCKIPSD,RBBP4,SERPINH1,SMARCA4,STMN1,THY1	14
Cardiovascular System Development and Function, Organismal Development	development of blood vessel	4.77E-03	Increased	1.537		ADA,CD36,CDC42,CLU,CYGB,ECE1,EDF1,FBLN5,ITGB2,MYH6,NCKIPSD,PTPRM,SEMA3C,SMARCA4,SOD1,SPINK5,STAT1,THBS1,THY1,YWHAZ	20
Cell Signaling, Post-Translational Modification	tyrosine phosphorylation of protein	6.67E-03	Increased	1.526		AFAP1L2,CD36,ITGB2,LYN,MIF,THBS1,THY1	7
Free Radical Scavenging	production of reactive oxygen species	6.95E-03	Increased	1.51		CD36,CDC42,CTTN,FBP1,FTH1,ITGB2,LYN,NCF1,PON2,SOD1,TRAP1,YWHAZ	12

## Sheet: Canonical pathways
Canonical Pathways
Ingenuity Canonical Pathways	-log(p-value)	Ratio	Molecules
EIF2 Signaling	7.6	0.0691	RPL24,RPL34,RPL30,RPS8,RPL26,RPL35A,RPL37A,RPL7,RPS4X,EIF3M,RPL14,RPS5,RPL13
Fcγ Receptor-mediated Phagocytosis in Macrophages and Monocytes	3.48	0.0606	NCF1,CDC42,ARPC2,LYN,ARPC3,TLN1
Clathrin-mediated Endocytosis Signaling	3.4	0.0426	ITGB2,RAB5A,CDC42,ARPC2,ARPC3,SERPINA1,CTTN,CLU
Actin Nucleation by ARP-WASP Complex	2.73	0.0714	CDC42,ARPC2,ARPC3,FNBP1
Integrin Signaling	2.53	0.0347	ITGB2,CDC42,ARPC2,ARPC3,TLN1,CTTN,FNBP1
Eumelanin Biosynthesis	2.35	0.182	MIF,DDT
Signaling by Rho Family GTPases	2.17	0.0297	STMN1,CDC42,ARPC2,SEPT7,ARPC3,CDC42EP1,FNBP1
Fatty Acid β-oxidation I	2.12	0.0698	ACAA1,ACSL5,ACSL4
Cell Cycle: G2/M DNA Damage Checkpoint Regulation	1.97	0.0612	YWHAH,YWHAB,YWHAZ
Regulation of Actin-based Motility by Rho	1.95	0.043	CDC42,ARPC2,ARPC3,FNBP1
Epithelial Adherens Junction Signaling	1.9	0.0338	MYH6,CDC42,ARPC2,ARPC3,PTPRM
Fatty Acid Activation	1.87	0.105	ACSL5,ACSL4
Granzyme A Signaling	1.83	0.1	H1F0,SET
Mitochondrial L-carnitine Shuttle Pathway	1.79	0.0952	ACSL5,ACSL4
Myc Mediated Apoptosis Signaling	1.77	0.0517	YWHAH,YWHAB,YWHAZ
γ-linolenate Biosynthesis II (Animals)	1.68	0.0833	ACSL5,ACSL4
ERK5 Signaling	1.66	0.0469	YWHAH,YWHAB,YWHAZ
fMLP Signaling in Neutrophils	1.64	0.0348	NCF1,CDC42,ARPC2,ARPC3
Remodeling of Epithelial Adherens Junctions	1.59	0.0441	RAB5A,ARPC2,ARPC3
Macropinocytosis Signaling	1.59	0.0441	ITGB2,RAB5A,CDC42
NRF2-mediated Oxidative Stress Response	1.57	0.0278	MGST1,SOD1,GSTA5,DNAJA4,FTH1
Agrin Interactions at Neuromuscular Junction	1.56	0.0429	ITGB2,CDC42,CTTN
CD28 Signaling in T Helper Cells	1.55	0.0325	CDC42,ARPC2,HLA-DRA,ARPC3
Production of Nitric Oxide and Reactive Oxygen Species in Macrophages	1.51	0.0269	NCF1,SERPINA1,STAT1,FNBP1,CLU
Mitochondrial Dysfunction	1.5	0.0266	ATP5H,ATP5B,NDUFA4L2,VDAC3,NDUFS4
ERK/MAPK Signaling	1.47	0.0262	YWHAH,YWHAB,YWHAZ,TLN1,STAT1
mTOR Signaling	1.45	0.0258	RPS8,RPS5,FNBP1,RPS4X,EIF3M

## Sheet: Networks
Networks
ID	Molecules in Network	Score	Focus Molecules	Top Diseases and Functions
1	14-3-3,14-3-3(β,γ,θ,η,ζ),60S ribosomal subunit,ACSL4,ADSSL1,EEF1G,H1F0,HNRNPU,ILF2,Jnk,LANCL1,NDRG1,NOLC1,RBM25,RBM39,Ribosomal 40s subunit,RNPS1,Rnr,RPL7,RPL13,RPL14,RPL24,RPL26,RPL34,RPL37A,RPS5,RPS8,RPS4X,SNRPB2,STAU1,STRAP,SUB1,YWHAB,YWHAH,YWHAZ	57	29	RNA Post-Transcriptional Modification, Cancer, Cell Cycle
2	AACS,ADK,AHSG,Akt,AMPK,ATP12A,ATP1B1,ATP1B3,ATPase,CD36,CLU,DDT,FSTL1,glutathione transferase,HDL,hemoglobin,IgG,LDL,LYN,MAN2C1,MYH6,Na-k-atpase,NADPH oxidase,NCF1,Nr1h,PFKFB2,PI3K (family),PON2,PRKAA,PSTPIP2,SEMA7A,SERPINA1,STAT5a/b,TRAP1,TRIM10	36	21	Infectious Disease, Energy Production, Lipid Metabolism
3	Alpha Actinin,ALT,BHMT,CACYBP,calpain,Cg,Collagen type IV,ECE1,ERK1/2,Fcer1,Fibrinogen,FSH,GUSB,Laminin,LGALS8,Lh,Mac1,MEMO1,MSMB,PLS3,Rab5,RAB1A,RAB5A,RCN1,S100A6,SEMA3C,SGSM3,SNAP23,SYK/ZAP,Syntaxin,TCF,TES,Tgf beta,THY1,TLN1	29	18	Cardiovascular System Development and Function, Cell-To-Cell Signaling and Interaction, Tissue Development
4	19S proteasome,26s Proteasome,ADRM1,Alpha tubulin,BZW1,Calcineurin protein(s),CDC42EP1,Cyclin E,CYGB,DCTN1,DMBT1,E2f,FTH1,FUBP1,Hdac,HISTONE,HLA-DR,HLA-DRA,HSP,Hsp70,Hsp90,NFAT (complex),NFkB (complex),Pak,PSMD5,PSMD14,Raf,RNF20,SEPT7,Sod,SOD1,STK38,STMN1,TRIM25,Ubiquitin	27	17	Hereditary Disorder, Neurological Disease, Free Radical Scavenging
5	ACSL5,Actin,Alpha catenin,Arp2/3,ARPC2,ARPC3,Cadherin,CAP1,CD3,CDC42,Cofilin,Collagen type I,CTTN,DSTN,ERK,F Actin,FNBP1,G-Actin,Importin beta,Integrin,MHC Class I (complex),NCKIPSD,PP2A,Rac,Ras homolog,RPL30,RPL35A,Sapk,SEC23B,SSBP1,STRN3,TCR,THBS1,TMED10,VDAC3	27	17	Cellular Assembly and Organization, Cellular Function and Maintenance, Protein Synthesis
6	ATP5B,ATP5H,CaMKII,Ck2,collagen,Collagen(s),EDF1,FBLN5,FBP1,Focal adhesion kinase,GDA,GYPC,IL1,Insulin,LAMB2,Mapk,MCFD2,MGST1,Mmp,NUCKS1,P38 MAPK,Pdgf (complex),PDGF BB,phosphatase,PITPNB,Pka,Pkc(s),PTPRM,SERPINH1,SET,Sos,SPINK5,Tnf (family),TPTE2,trypsin	27	17	Cell Morphology, Tissue Morphology, Cell-To-Cell Signaling and Interaction
7	ACD,ARHGAP25,AS3MT,C11orf54,CCDC64B,DCP2,DCP1A,DCP1B,EDC3,EDC4,EXOSC6,FAM118B,FARSB,IL13RA1,KIF21A,LAS1L,LEPRE1,LSM8,MPST,MTR,MTRR,NOL9,PAPSS1,PAPSS2,PELP1,PGM2,PITHD1,RAB12,SCAPER,TMEM39B,TRIM47,UBA5,UBC,USP4,VCPIP1	25	16	Developmental Disorder, Hereditary Disorder, Metabolic Disease
8	ABCF2,ACAA1,ACTR6,APOOL,ATP6V1D,ATP6V1G2,DDHD1,DDX49,EIF3D,EIF3G,EIF3M,IVNS1ABP,KLHDC3,MLEC,MXRA7,MYO1F,NR2F6,NUP54,NUPL1,OLA1,PDLIM4,PEX7,RAD51B,RBM17,RRAGB,SAP30BP,SDR16C5,SRSF11,SUGP1,THAP11,TXNDC11,UBC,YIF1B,YIPF5,ZBTB9	25	16	Hereditary Disorder, Neurological Disease, Connective Tissue Disorders
9	AARS,C17orf49,CORO1C,DNAJA4,DNAJB4,EDEM2,FBN2,FKBP9,HERC6,HSP90AA1,HSPB3,HSPH1,IFRD1,KCTD8,LLGL2,MLF2,MYH8,MYO9B,NUP50,NUP54,P4HA1,PLOD1,PPIE,RASSF9,RBMS1,RNF213,RPL39,SEC61A1,SEC61G,THOC2,THOC3,THOC7,TXNDC5,UBC,WDR82	23	15	Cellular Compromise, Cellular Function and Maintenance, Post-Translational Modification
10	ADA,AFAP1L2,Ap1,BCL7A,C19orf12,caspase,CKAP4,Creb,Cyclin A,estrogen receptor,GPD1,GSTA5,Histone h3,Histone h4,Ifn,Iga,Igm,IKZF1,IL12 (complex),IL12 (family),Immunoglobulin,LAMC2,Mek,MHC Class II (complex),Mi2,MIF,NOMO1 (includes others),PI3K (complex),Rb,RBBP4,RNA polymerase II,Rxr,SMARCA4,STAT1,thymidine kinase	21	14	Cell Morphology, Cellular Assembly and Organization, Cellular Growth and Proliferation

## Sheet: Molecules
Molecules
Symbol	Entrez Gene Name	Affymetrix/Affymetrix SNP ID/Agilent/CAS Registry Number/CodeLink/dbSNP/Ensembl/Entrez Gene/GenBank/Gene Symbol - mouse (Entrez Gene)/Gene Symbol - rat (Entrez Gene)/Gene symbol -- human (Hugo / HGNC, Entrez Gene)/GenPept/GI Number/Human Metabolome Database (HMDB)/Illumina/Ingenuity/International Protein Index/KEGG/Life Technologies (Applied Biosystems)/miRBase (mature)/miRBase (stemloop)/PubChem…	Fold Change	Networks	Location	Type(s)	Biomarker Application(s)	Drug(s)	Entrez Gene ID for Human	Entrez Gene ID for Mouse	Entrez Gene ID for Rat
(13S)-hydroperoxyoctadecadienoic acid	--	--			Other	chemical - endogenous mammalian
1,2-dithiol-3-thione	--	--			Other	chemical reagent
1-nitrocyclohex-1-ene	--	--			Other	chemical toxicant
13-hydroxyoctadecadienoic acid	--	--			Other	chemical - endogenous mammalian
14-3-3	--	--		1	Cytoplasm	group	unspecified application
14-3-3(β,γ,θ,η,ζ)	--	--		1	Cytoplasm	group
15-deoxy-delta-12,14 -PGJ 2	--	--			Other	chemical - endogenous non-mammalian
15-hydroxyeicosatetraenoic acid	--	--			Other	chemical - endogenous mammalian
15-LOX	--	--			Other	group
19S proteasome	--	--		4	Other	complex
2,2'-dipyridyl	--	--			Other	chemical toxicant
2-cyclohexen-1-one	--	--			Other	chemical - endogenous non-mammalian
2-methoxyestradiol	--	--			Other	chemical - endogenous mammalian
26s Proteasome	--	--		4	Cytoplasm	complex		carfilzomib, bortezomib/sorafenib, bortezomib/melphalan, bortezomib/doxorubicin, bortezomib/vorinostat, bortezomib/rituximab, bortezomib
4-aminophenol	--	--			Other	chemical - endogenous mammalian
4-phenylbutyric acid	--	--			Other	chemical - endogenous mammalian
4-tert-octylphenol	--	--			Other	chemical toxicant
5-(3-chloro-4-(2,3-dihydroxy-propoxy)benzylidene)-2-propylimino-3-o-tolyl-thiazolidin-4-one	--	--			Other	chemical drug
5-fluorouracil	--	--			Other	chemical drug
60S ribosomal subunit	--	--		1	Cytoplasm	complex
7S NGF	--	--			Other	complex
9Z,11E-octadecadienoic acid	--	--			Other	chemical - endogenous non-mammalian
AACS	acetoacetyl-CoA synthetase	--	1.313	2	Cytoplasm	enzyme			65985	78894	65984
AARS	alanyl-tRNA synthetase	--		9	Cytoplasm	enzyme			16	234734	292023
ABCB7	ATP-binding cassette, sub-family B (MDR/TAP), member 7	--			Cytoplasm	transporter	unspecified application		22	11306	302395
ABCF2	ATP-binding cassette, sub-family F (GCN20), member 2	--	1.340	8	Cytoplasm	transporter			10061	27407
ACAA1	acetyl-CoA acyltransferase 1	--	1.388	8	Cytoplasm	enzyme	unspecified application		30	113868	501072|24157
ACAP2	ArfGAP with coiled-coil, ankyrin repeat and PH domains 2	--	1.454	13	Nucleus	other			23527	78618	619382
ACD	adrenocortical dysplasia homolog (mouse)	--		7	Nucleus	other			65057	497652	307798
acetaminophen	--	--			Other	chemical drug
acetazolamide	--	--			Other	chemical drug
ACSL4	acyl-CoA synthetase long-chain family member 4	--	-1.555	1	Cytoplasm	enzyme			2182	50790	113976
ACSL5	acyl-CoA synthetase long-chain family member 5	--	-1.537	5	Cytoplasm	enzyme			51703	433256	94340
ACTB	actin, beta	--			Cytoplasm	other			60	11461	81822
Actin	--	--		5	Cytoplasm	group	response to therapy
ACTR6	ARP6 actin-related protein 6 homolog (yeast)	--		8	Other	transporter			64431	67019	314718
ADA	adenosine deaminase	--	-1.611	10	Cytoplasm	enzyme		pentostatin, aspirin/dipyridamole/telmisartan, cyclophosphamide/pentostatin/rituximab, pentostatin/rituximab, alemtuzumab/pentostatin, dipyridamole, aspirin/dipyridamole, vidarabine	100	11486	24165
ADAMTS1	ADAM metallopeptidase with thrombospondin type 1 motif, 1	--			Extracellular Space	peptidase			9510	11504	79252
ADH1A	alcohol dehydrogenase 1A (class I), alpha polypeptide	--	-1.804	11	Cytoplasm	enzyme		caffeine/ethanol, fomepizole, ethanol	124
ADIPOQ	adiponectin, C1Q and collagen domain containing	--			Extracellular Space	other	diagnosis,efficacy,prognosis,response to therapy,safety,unspecified application		9370	11450	246253
ADK	adenosine kinase	--	1.323	2	Nucleus	kinase	unspecified application	pegintron/ribavirin, PEG-interferon alfa-2a/ribavirin, interferon alfa-2b/ribavirin, ribavirin	132	11534	25368
ADRB	--	--		12	Plasma Membrane	group
ADRM1	adhesion regulating molecule 1	--	1.409	4	Plasma Membrane	other	unspecified application		11047	56436	65138
ADSSL1	adenylosuccinate synthase like 1	--	-1.459	1	Cytoplasm	enzyme			122622	11565	684425
AFAP1L2	actin filament associated protein 1-like 2	--	1.726	10,12	Cytoplasm	other			84632	226250	292130
AGT	angiotensinogen (serpin peptidase inhibitor, clade A, member 8)	--			Extracellular Space	growth factor	efficacy		183	11606	24179
AGTR1	angiotensin II receptor, type 1	--			Plasma Membrane	G-protein coupled receptor		amlodipine/olmesartan medoxomil, olmesartan, amlodipine/hydrochlorothiazide/valsartan, amlodipine/telmisartan, aliskiren/valsartan, azilsartan kamedoxomil, amlodipine/hydrochlorothiazide/olmesartan medoxomil, aspirin/dipyridamole/telmisartan, clopidogrel/telmisartan, amlodipine/valsartan, hydrochlorothiazide/losartan, hydrochlorothiazide/valsartan, candesartan, candesartan cilexetil, olmesartan m…	185	11607	24180
AHI1	Abelson helper integration site 1	--			Cytoplasm	other	unspecified application		54806	52906	308923
AHR	aryl hydrocarbon receptor	--			Nucleus	ligand-dependent nuclear receptor			196	11622	25690
AHSG	alpha-2-HS-glycoprotein	--	1.430	2	Extracellular Space	other	unspecified application		197	11625	25373
AIF1	allograft inflammatory factor 1	--		11	Nucleus	other			199	11629	29427
Akt	--	--		2	Cytoplasm	group	diagnosis,disease progression,efficacy,prognosis,response to therapy,safety	afuresertib
alcohol dehydrogenase	--	--		11	Other	group	safety,unspecified application
aldosterone	--	--			Other	chemical - endogenous mammalian	diagnosis,efficacy
allopurinol	--	--			Other	chemical drug
allosamidin	--	--			Other	chemical reagent
Alpha Actinin	--	--		3	Cytoplasm	group
Alpha catenin	--	--		5	Cytoplasm	group
Alpha tubulin	--	--		4	Cytoplasm	group
ALT	--	--		3,13	Other	group	efficacy,safety
AMPK	--	--		2	Cytoplasm	complex
amprenavir	--	--			Other	chemical drug
ANGPT2	angiopoietin 2	--			Extracellular Space	growth factor	diagnosis,efficacy,prognosis,unspecified application	trebananib	285	11601	89805
ANGPTL4	angiopoietin-like 4	--			Extracellular Space	other			51129	57875	362850
Ap1	--	--		10	Nucleus	complex
AP2A1	adaptor-related protein complex 2, alpha 1 subunit	--			Cytoplasm	transporter			160	11771	308578
APOE	apolipoprotein E	--			Extracellular Space	transporter	diagnosis,efficacy,prognosis,unspecified application		348	11816	25728
APOH	apolipoprotein H (beta-2-glycoprotein I)	--		13	Extracellular Space	transporter	unspecified application		350	11818	287774
APOOL	apolipoprotein O-like	--	-1.717	8	Extracellular Space	other			139322	68117	317191
APP	amyloid beta (A4) precursor protein	--		11	Plasma Membrane	other	diagnosis,efficacy,unspecified application	bapineuzumab, florbetapir F18, florbetaben F	351	11820	54226
AR	androgen receptor	--		11	Nucleus	ligand-dependent nuclear receptor	diagnosis,disease progression,efficacy	estradiol valerate/testosterone enanthate, estradiol cypionate/testosterone cypionate, BMS-641988, cyproterone acetate/ethinyl estradiol, enzalutamide, 1-testosterone, flutamide/goserelin, nandrolone phenpropionate, drospirenone/ethinyl estradiol, nilutamide, bicalutamide, flutamide, nandrolone decanoate, testosterone cypionate, cyproterone acetate, drospirenone, medroxyprogesterone acetate, oxan…	367	11835	24208
arachidonic acid	--	--			Other	chemical - endogenous mammalian	efficacy
ARF6	ADP-ribosylation factor 6	--		13	Plasma Membrane	transporter			382	11845	79121
ARHGAP25	Rho GTPase activating protein 25	--	1.747	7	Cytoplasm	other			9938	232201	500246
ARHGEF25	Rho guanine nucleotide exchange factor (GEF) 25	--			Cytoplasm	other			115557	52666	314904
Arp2/3	--	--		5	Cytoplasm	complex
ARPC2	actin related protein 2/3 complex, subunit 2, 34kDa	--	1.429	5	Cytoplasm	other			10109	76709	301511
ARPC3	actin related protein 2/3 complex, subunit 3, 21kDa	--	1.653	5	Cytoplasm	other			10094	56378	288669
AS3MT	arsenic (+3 oxidation state) methyltransferase	--	1.638	7	Cytoplasm	enzyme			57412	57344	140925
ATF1	activating transcription factor 1	--			Nucleus	transcription regulator			466	11908|100040260	315305
ATL3	atlastin GTPase 3	--		11	Cytoplasm	other			25923	109168	309187
ATOX1	antioxidant 1 copper chaperone	--	1.450	11	Cytoplasm	transporter			475	11927	84355
ATP12A	ATPase, H+/K+ transporting, nongastric, alpha polypeptide	--	-1.546	2	Plasma Membrane	transporter			479	192113	171028
ATP1B1	ATPase, Na+/K+ transporting, beta 1 polypeptide	--	-1.755	2	Plasma Membrane	transporter			481	11931	25650
ATP1B3	ATPase, Na+/K+ transporting, beta 3 polypeptide	--	1.301	2,12	Plasma Membrane	transporter			483	11933	25390
ATP5B	ATP synthase, H+ transporting, mitochondrial F1 complex, beta polypeptide	--	-1.511	6	Cytoplasm	transporter			506	11947	171374
ATP5H	ATP synthase, H+ transporting, mitochondrial Fo complex, subunit d	--	1.311	6	Cytoplasm	enzyme			10476	71679	641434
ATP6V1D	ATPase, H+ transporting, lysosomal 34kDa, V1 subunit D	--	-1.546	8	Cytoplasm	transporter			51382	73834	299159
ATP6V1G2	ATPase, H+ transporting, lysosomal 13kDa, V1 subunit G2	--		8	Cytoplasm	transporter			534	66237	368044
ATPase	--	--		2	Other	group
BBC3	BCL2 binding component 3	--			Cytoplasm	other			27113	170770	317673
BCL7A	B-cell CLL/lymphoma 7A	--	1.354	10	Other	other	unspecified application		605	77045	690085
benzyloxycarbonyl-Leu-Leu-Leu aldehyde	--	--			Other	chemical - protease inhibitor
beta-estradiol	--	--			Other	chemical - endogenous mammalian	diagnosis,efficacy,safety
bezafibrate	--	--			Other	chemical drug
BHMT	betaine--homocysteine S-methyltransferase	--	-3.610	3	Cytoplasm	enzyme			635	12116	81508
bisindolylmaleimide I	--	--			Other	chemical - kinase inhibitor
BMI1	BMI1 polycomb ring finger oncogene	--			Nucleus	transcription regulator	diagnosis,efficacy,prognosis		648
BMS-275183	--	--			Other	chemical drug
boldine	--	--			Other	chemical - endogenous non-mammalian
BRCA1	breast cancer 1, early onset	--		12	Nucleus	transcription regulator	diagnosis,efficacy,response to therapy		672	12189	497672
bufalin	--	--			Other	chemical reagent
butyric acid	--	--			Other	chemical - endogenous mammalian
BZW1	basic leucine zipper and W2 domains 1	--	1.365	4	Cytoplasm	translation regulator			9689	66882	363232
C11orf54	chromosome 11 open reading frame 54	--	1.525	7	Nucleus	other			28970	70984	363016
C17orf49	chromosome 17 open reading frame 49	--		9	Nucleus	other			124944	104457	287452
C19orf12	chromosome 19 open reading frame 12	--	1.310	10,11	Other	other			83636	72244	690000
C3AR1	complement component 3a receptor 1	--		13	Plasma Membrane	G-protein coupled receptor			719	12267	84007
C6orf62	chromosome 6 open reading frame 62	--		11	Other	other			81688	79555
CA4	carbonic anhydrase IV	--			Plasma Membrane	enzyme		ethoxyzolamide, dichlorphenamide, phentermine/topiramate, methazolamide, hydrochlorothiazide, acetazolamide, trichloromethiazide, chlorothiazide, chlorothiazide/reserpine, chlorthalidone, benzthiazide, sulfacetamide, topiramate	762	12351	29242
CACYBP	calcyclin binding protein	--	1.387	3	Nucleus	other			27101	12301	289144
Cadherin	--	--		5	Plasma Membrane	group
Calcineurin protein(s)	--	--		4	Cytoplasm	complex
Calmodulin	--	--		12	Cytoplasm	group
calpain	--	--		3	Cytoplasm	complex
CaMKII	--	--		6	Cytoplasm	complex
CAP1	CAP, adenylate cyclase-associated protein 1 (yeast)	--	1.369	5	Plasma Membrane	other			10487	12331	64185
captopril	--	--			Other	chemical drug
caspase	--	--		10	Cytoplasm	group
catechol	--	--			Other	chemical - endogenous mammalian
cation	--	--			Other	chemical - other
CBL	Cbl proto-oncogene, E3 ubiquitin protein ligase	--			Nucleus	transcription regulator			867	12402	500985
CCDC64B	coiled-coil domain containing 64B	--		7	Other	other			146439	212733	302964
CD3	--	--		5	Plasma Membrane	complex	efficacy	visilizumab, catumaxomab
CD36	CD36 molecule (thrombospondin receptor)	--	-1.858	2	Plasma Membrane	transmembrane receptor	efficacy		948	12491	29184
CD38	CD38 molecule	--			Plasma Membrane	enzyme	efficacy,prognosis,unspecified application		952	12494	25668
CD44	CD44 molecule (Indian blood group)	--			Plasma Membrane	enzyme	diagnosis,disease progression,prognosis,unspecified application		960	12505	25406
CD180	CD180 molecule	--		13	Plasma Membrane	other			4064	17079	294706
CD 437	--	--			Other	chemical drug
CDC42	cell division cycle 42	--	1.881	5	Cytoplasm	enzyme			998
CDC42EP1	CDC42 effector protein (Rho GTPase binding) 1	--	1.463	4	Extracellular Space	other			11135	104445	315121
CDH11	cadherin 11, type 2, OB-cadherin (osteoblast)	--			Plasma Membrane	other	efficacy,prognosis		1009	12552	84407
CDKN3	cyclin-dependent kinase inhibitor 3	--		12	Cytoplasm	phosphatase			1033	72391
CEND1	cell cycle exit and neuronal differentiation 1	--	1.450	11	Other	other			51286	57754
CERS2	ceramide synthase 2	--			Nucleus	transcription regulator	diagnosis		29956	76893	310667
CFH	complement factor H	--		13	Extracellular Space	other	unspecified application		3075	12628	155012
CFL1	cofilin 1 (non-muscle)	--			Nucleus	other			1072	12631	29271
CFTR	cystic fibrosis transmembrane conductance regulator (ATP-binding cassette sub-family C, member 7)	--			Plasma Membrane	ion channel	diagnosis,disease progression	crofelemer, ivacaftor	1080	12638	24255
Cg	--	--		3	Other	complex	diagnosis,prognosis,unspecified application
CHD3	chromodomain helicase DNA binding protein 3	--			Nucleus	enzyme			1107	216848	303241
chenodeoxycholic acid	--	--			Other	chemical - endogenous mammalian
cibacron blue F 3GA	--	--			Other	chemical reagent
ciglitazone	--	--			Other	chemical drug
cineole	--	--			Other	chemical drug
ciprofibrate	--	--			Other	chemical drug
ciprofloxacin	--	--			Other	chemical drug
cisplatin	--	--			Other	chemical drug
Ck2	--	--		6	Cytoplasm	complex
CKAP4	cytoskeleton-associated protein 4	--	2.112	10	Cytoplasm	other			10970	216197	362859
CLCF1	cardiotrophin-like cytokine factor 1	--		13	Extracellular Space	cytokine			23529	56708	365395
CLDN7	claudin 7	--			Plasma Membrane	other	unspecified application		1366	53624	65132
CLEC11A	C-type lectin domain family 11, member A	--			Extracellular Space	growth factor			6320	20256	29313
clofibrate	--	--			Other	chemical drug
CLU	clusterin	--	-1.492	2	Cytoplasm	other	efficacy,unspecified application		1191	12759	24854
clusterin antisense oligonucleotide	--	--			Other	biologic drug
CNKSR3	CNKSR family member 3	--	1.371	12	Plasma Membrane	kinase			154043	215748	308113
CNPY3	canopy FGF signaling regulator 3	--	1.341	13	Cytoplasm	other			10695	72029	685174
Co2+	--	--			Other	chemical - endogenous mammalian
cocaine	--	--			Other	chemical drug
Cofilin	--	--		5	Cytoplasm	group
Col17a1	collagen, type XVII, alpha 1	--			Plasma Membrane	other				12821	294027
COL18A1	collagen, type XVIII, alpha 1	--			Extracellular Space	other	diagnosis	collagenase clostridium histolyticum	80781	12822	85251
COL7A1	collagen, type VII, alpha 1	--			Extracellular Space	other		collagenase clostridium histolyticum	1294	12836	301012
collagen	--	--		6	Other	group
Collagen type I	--	--		5	Other	complex	diagnosis
Collagen type IV	--	--		3	Other	complex
Collagen(s)	--	--		6	Extracellular Space	complex
CORO1C	coronin, actin binding protein, 1C	--	1.867	9	Cytoplasm	other			23603	23790	501841
CpG 10101	--	--			Other	chemical drug
Creb	--	--		10	Nucleus	group
CRIP1	cysteine-rich protein 1 (intestinal)	--	1.707	12	Cytoplasm	other	unspecified application		1396	12925	691657
CRYZL1	crystallin, zeta (quinone reductase)-like 1	--	-1.772	12	Cytoplasm	enzyme			9946	66609	288256
CTTN	cortactin	--	1.327	5	Plasma Membrane	other	efficacy		2017	13043	60465
cumene hydroperoxide	--	--			Other	chemical toxicant
CYB561	cytochrome b561	--		12	Cytoplasm	enzyme			1534	13056	303601
Cyclin A	--	--		10	Nucleus	group	unspecified application
Cyclin E	--	--		4	Nucleus	group	efficacy,prognosis,unspecified application
cyclophosphamide	--	--			Other	chemical drug
cyclosporin A	--	--			Other	biologic drug
CYGB	cytoglobin	--	1.574	4	Cytoplasm	transporter	diagnosis		114757	114886	170520
CYP2E1	cytochrome P450, family 2, subfamily E, polypeptide 1	--			Cytoplasm	enzyme	diagnosis		1571	13106	25086
cytochrome C	--	--		12	Cytoplasm	group	unspecified application
D-glucose	--	--			Other	chemical - endogenous mammalian	diagnosis,efficacy,safety
DAB1	Dab, reelin signal transducer, homolog 1 (Drosophila)	--		12	Cytoplasm	other			1600	13131	266729
DAB2IP	DAB2 interacting protein	--			Plasma Membrane	other			153090	69601	192126
DCP2	decapping mRNA 2	--		7	Nucleus	enzyme			167227	70640	291604
DCP1A	decapping mRNA 1A	--		7	Nucleus	other			55802	75901	361109
DCP1B	decapping mRNA 1B	--	1.483	7	Cytoplasm	other			196513	319618	500305
DCTN1	dynactin 1	--	1.359	4	Cytoplasm	other			1639	13191	29167
DDHD1	DDHD domain containing 1	--	-2.249	8	Extracellular Space	enzyme			80821	114874	305816
DDT	D-dopachrome tautomerase	--	-1.514	2	Cytoplasm	enzyme			1652	13202	29318
DDX49	DEAD (Asp-Glu-Ala-Asp) box polypeptide 49	--		8	Nucleus	enzyme			54555	234374	290660
decitabine	--	--			Other	chemical drug
desmopressin	--	--			Other	biologic drug
desmosterol	--	--			Other	chemical - endogenous mammalian
dexamethasone	--	--			Other	chemical drug
dexamethasone phosphate	--	--			Other	chemical drug
dextran sulfate	--	--			Other	chemical drug
DHRS9	dehydrogenase/reductase (SDR family) member 9	--		11	Cytoplasm	enzyme			10170	241452	170635
di(2-ethylhexyl) phthalate	--	--			Other	chemical toxicant
dihydrotestosterone	--	--			Other	chemical - endogenous mammalian	diagnosis,efficacy
dimethyl sulfoxide	--	--			Other	chemical drug
dinoprost	--	--			Other	chemical - endogenous mammalian	efficacy
dioctyl adipate	--	--			Other	chemical toxicant
DMBT1	deleted in malignant brain tumors 1	--	-2.624	4	Plasma Membrane	transmembrane receptor			1755	12945	170568
DNAJA4	DnaJ (Hsp40) homolog, subfamily A, member 4	--	-2.179	9	Nucleus	other	safety		55466	58233	300721
DNAJB4	DnaJ (Hsp40) homolog, subfamily B, member 4	--		9	Nucleus	other			11080	67035	295549
doxorubicin	--	--			Other	chemical drug
DRAP1	DR1-associated protein 1 (negative cofactor 2 alpha)	--			Nucleus	transcription regulator			10589	66556	293674
DROSHA	drosha, ribonuclease type III	--			Nucleus	enzyme			29102	14000	310159
DSTN	destrin (actin depolymerizing factor)	--	1.611	5	Cytoplasm	other			11034	56431
E2f	--	--		4	Nucleus	group
EBP	emopamil binding protein (sterol isomerase)	--		12	Cytoplasm	enzyme		SR 31747	10682	13595	117278
ECE1	endothelin converting enzyme 1	--	-1.527	3	Plasma Membrane	peptidase			1889	230857	94204
ECT2	epithelial cell transforming 2	--			Cytoplasm	other			1894	13605	361921
EDC3	enhancer of mRNA decapping 3	--		7	Cytoplasm	other			80153	353190	315708
EDC4	enhancer of mRNA decapping 4	--		7	Cytoplasm	other			23644	234699	361399
EDEM2	ER degradation enhancer, mannosidase alpha-like 2	--		9	Cytoplasm	enzyme			55741	108687	296304
EDF1	endothelial differentiation-related factor 1	--	1.488	6	Nucleus	transcription regulator			8721	59022	296570
EDN1	endothelin 1	--			Extracellular Space	cytokine	diagnosis,efficacy,prognosis,unspecified application		1906	13614	24323
EEF1A2	eukaryotic translation elongation factor 1 alpha 2	--			Cytoplasm	translation regulator	prognosis,unspecified application		1917	13628	24799
EEF1G	eukaryotic translation elongation factor 1 gamma	--	-1.568	1	Cytoplasm	translation regulator			1937	67160	293725
EGF	epidermal growth factor	--			Extracellular Space	growth factor	diagnosis,efficacy,response to therapy,unspecified application		1950	13645	25313
EGR1	early growth response 1	--			Nucleus	transcription regulator	diagnosis		1958	13653	24330
EHHADH	enoyl-CoA, hydratase/3-hydroxyacyl CoA dehydrogenase	--			Cytoplasm	enzyme			1962	74147	171142
EIF2AK3	eukaryotic translation initiation factor 2-alpha kinase 3	--			Cytoplasm	kinase	efficacy		9451	13666	29702
EIF3D	eukaryotic translation initiation factor 3, subunit D	--		8	Cytoplasm	other			8664	55944	362952
EIF3G	eukaryotic translation initiation factor 3, subunit G	--		8	Cytoplasm	other			8666	53356	298700
EIF3M	eukaryotic translation initiation factor 3, subunit M	--	1.589	8	Other	other			10480	98221	295975
ELF2	E74-like factor 2 (ets domain transcription factor)	--			Nucleus	transcription regulator			1998	69257	361944
EMP1	epithelial membrane protein 1	--		12,13	Plasma Membrane	other			2012	13730	25314
ENPP6	ectonucleotide pyrophosphatase/phosphodiesterase 6	--	-1.434	11	Cytoplasm	enzyme			133121	320981	306460
EPB41	erythrocyte membrane protein band 4.1 (elliptocytosis 1, RH-linked)	--			Plasma Membrane	other			2035	269587	313052
ERBB2	v-erb-b2 avian erythroblastic leukemia viral oncogene homolog 2	--		12	Plasma Membrane	kinase	diagnosis,disease progression,efficacy,prognosis,safety	trastuzumab, BMS-599626, varlitinib, XL647, CP-724,714, afatinib, pertuzumab, sapitinib, trastuzumab emtansine, lapatinib/pazopanib, lapatinib/letrozole, paclitaxel/trastuzumab, capecitabine/lapatinib, cyclophosphamide/docetaxel/epirubicin/5-fluorouracil/trastuzumab, docetaxel/trastuzumab, paclitaxel/pertuzumab/trastuzumab, trastuzumab/vinorelbine, capecitabine/trastuzumab, lapatinib/paclitaxel, …	2064	13866	24337
ERBB3	v-erb-b2 avian erythroblastic leukemia viral oncogene homolog 3	--			Plasma Membrane	kinase	efficacy,prognosis,safety	sapitinib	2065	13867	29496
ERF	Ets2 repressor factor	--			Nucleus	transcription regulator			2077	13875	292721
ERG	v-ets avian erythroblastosis virus E26 oncogene homolog	--			Nucleus	transcription regulator	prognosis		2078	13876	170909
ERK	--	--		5	Other	group	efficacy
ERK1/2	--	--		3	Cytoplasm	group
ESRRA	estrogen-related receptor alpha	--			Nucleus	ligand-dependent nuclear receptor	diagnosis		2101
Esrra	estrogen related receptor, alpha	--			Nucleus	transcription regulator				26379	293701
estrogen receptor	--	--		10	Nucleus	group	diagnosis,efficacy,unspecified application	estradiol valerate
etanercept	--	--			Other	biologic drug
ETFA	electron-transfer-flavoprotein, alpha polypeptide	--		11	Cytoplasm	transporter			2108	110842	300726
ethionine	--	--			Other	chemical toxicant
etodolac	--	--			Other	chemical drug
EXOSC6	exosome component 6	--		7	Nucleus	other			118460	72544	307850
F2	coagulation factor II (thrombin)	--			Extracellular Space	peptidase	diagnosis,unspecified application	enoxaparin, desirudin, dabigatran etexilate, Fibrinogen, ximelagatran, antithrombin alfa, aspirin/dabigatran etexilate, dabigatran, argatroban, bivalirudin, lepirudin	2147	14061	29251
F Actin	--	--		5	Cytoplasm	complex	unspecified application
F2R	coagulation factor II (thrombin) receptor	--			Plasma Membrane	G-protein coupled receptor	disease progression	chrysalin, argatroban, bivalirudin	2149	14062	25439
FAAH	fatty acid amide hydrolase	--			Plasma Membrane	enzyme			2166	14073	29347|100911581
FAM118B	family with sequence similarity 118, member B	--		7	Other	other			79607	109229	315549
FAM132B	family with sequence similarity 132, member B	--			Extracellular Space	other			151176	227358	681056
FARP2	FERM, RhoGEF and pleckstrin domain protein 2	--			Cytoplasm	other			9855	227377	316639
FARSB	phenylalanyl-tRNA synthetase, beta subunit	--	1.372	7	Cytoplasm	enzyme			10056	23874	301544
FBLN5	fibulin 5	--	-1.746	6	Extracellular Space	other			10516	23876	29158
FBN2	fibrillin 2	--	-1.660	9	Extracellular Space	other			2201	14119	689008
FBP1	fructose-1,6-bisphosphatase 1	--	-1.566	6	Cytoplasm	phosphatase			2203	14121	24362
FBXL5	F-box and leucine-rich repeat protein 5	--			Cytoplasm	enzyme			26234	242960	305424
Fcer1	--	--		3	Plasma Membrane	complex
Fcgr2	--	--		13	Plasma Membrane	group	efficacy
Fcgr3	--	--		13	Plasma Membrane	group	efficacy
fenamic acid	--	--			Other	chemical reagent
fenofibrate	--	--			Other	chemical drug
ferric chloride	--	--			Other	chemical toxicant
ferric citrate	--	--			Other	chemical drug
FGF19	fibroblast growth factor 19	--			Extracellular Space	growth factor			9965	14170	170582
FHIT	fragile histidine triad	--			Cytoplasm	enzyme	efficacy		2272	14198	60398
Fibrinogen	--	--		3	Plasma Membrane	complex	diagnosis,disease progression,efficacy,prognosis,safety
FKBP9	FK506 binding protein 9, 63 kDa	--		9	Cytoplasm	enzyme			11328	27055	297123
FLT1	fms-related tyrosine kinase 1	--			Plasma Membrane	kinase	diagnosis,disease progression,efficacy,prognosis,response to therapy,safety	sunitinib, pazopanib, axitinib, CEP 7055, motesanib, cabozantinib, regorafenib, bortezomib/sorafenib, lapatinib/pazopanib, dexamethasone/lenalidomide/sorafenib, bevacizumab/sorafenib, cabozantinib/erlotinib, sorafenib, vandetanib	2321	14254
FN1	fibronectin 1	--			Extracellular Space	enzyme	diagnosis,efficacy,prognosis,unspecified application	ocriplasmin	2335	14268	25661
FNBP1	formin binding protein 1	--	1.468	5	Nucleus	enzyme			23048	14269	192348
Focal adhesion kinase	--	--		6	Cytoplasm	group
forskolin	--	--			Other	chemical toxicant
FOS	FBJ murine osteosarcoma viral oncogene homolog	--			Nucleus	transcription regulator	diagnosis,efficacy		2353	14281	314322
FOXO1	forkhead box O1	--			Nucleus	transcription regulator			2308	56458	84482
Fructus xanthii aqueous extract	--	--			Other	chemical - endogenous non-mammalian
FSH	--	--		3	Plasma Membrane	complex
FSTL1	follistatin-like 1	--	1.479	2	Extracellular Space	other			11167	14314	79210
FTH1	ferritin, heavy polypeptide 1	--	-1.443	4	Cytoplasm	enzyme	unspecified application		2495	14319	25319|689130
FTL	ferritin, light polypeptide	--			Cytoplasm	enzyme	diagnosis,unspecified application		2512	434624|14325	29292|100362384|100360087|501644|100359668|499244|500804|100363177
FTMT	ferritin mitochondrial	--			Cytoplasm	enzyme			94033	67634	291470
FUBP1	far upstream element (FUSE) binding protein 1	--	1.710	4	Nucleus	transcription regulator			8880	51886	654496
G-Actin	--	--		5	Cytoplasm	group
G3BP1	GTPase activating protein (SH3 domain) binding protein 1	--	1.523	11	Nucleus	enzyme			10146	27041	171092
G6PC3	glucose 6 phosphatase, catalytic, 3	--			Cytoplasm	phosphatase			92579	68401	303565
GABPA	GA binding protein transcription factor, alpha subunit 60kDa	--			Nucleus	transcription regulator			2551	14390	363735
galactose	--	--			Other	chemical - endogenous mammalian
GAST	gastrin	--			Extracellular Space	other	efficacy,safety		2520	14459	25320
GDA	guanine deaminase	--	-1.592	6	Cytoplasm	enzyme			9615	14544	83585
geldanamycin	--	--			Other	chemical - endogenous non-mammalian
gentamicin	--	--			Other	chemical drug
gentamicin C	--	--			Other	chemical drug
GFI1	growth factor independent 1 transcription repressor	--			Nucleus	transcription regulator			2672	14581	24388
GH1	growth hormone 1	--			Extracellular Space	growth factor	efficacy		2688
GJB6	gap junction protein, beta 6, 30kDa	--			Plasma Membrane	transporter			10804	14623	84403
GLI1	GLI family zinc finger 1	--			Nucleus	transcription regulator	efficacy		2735	14632	140589
glucocorticoid	--	--			Other	chemical drug
glutamyl-Se-methylselenocysteine	--	--			Other	chemical - endogenous mammalian
glutathione transferase	--	--		2	Other	group
glyphosate	--	--			Other	chemical toxicant
GNA15	guanine nucleotide binding protein (G protein), alpha 15 (Gq class)	--			Plasma Membrane	enzyme			2769	14676	89788
GPBP1	GC-rich promoter binding protein 1	--			Nucleus	transcription regulator			65056	73274	294734
GPD1	glycerol-3-phosphate dehydrogenase 1 (soluble)	--	-1.452	10	Cytoplasm	enzyme	unspecified application		2819	14555	60666
GPR34	G protein-coupled receptor 34	--			Plasma Membrane	other			2857	23890	554353
GPR39	G protein-coupled receptor 39	--			Plasma Membrane	G-protein coupled receptor			2863	71111	288995
GRB2	growth factor receptor-bound protein 2	--		11	Cytoplasm	other			2885	14784	81504
GSTA5	glutathione S-transferase alpha 5	--	-1.577	10	Cytoplasm	enzyme			221357	100042314|100042295|14857|14858	494499
GSTZ1	glutathione S-transferase zeta 1	--			Cytoplasm	enzyme			2954	14874	681913
GUSB	glucuronidase, beta	--	1.386	3	Cytoplasm	enzyme			2990	110006	24434
GW501516	--	--			Other	chemical drug
GYPC	glycophorin C (Gerbich blood group)	--	1.560	6	Plasma Membrane	other	unspecified application		2995	71683	364837
H1F0	H1 histone family, member 0	--	-1.724	1	Nucleus	other			3005	14958
H2AFX	H2A histone family, member X	--			Nucleus	transcription regulator	efficacy		3014	15270	500987
halofuginone	--	--			Other	chemical drug
Hdac	--	--		4	Nucleus	group		vorinostat
HDAC5	histone deacetylase 5	--			Nucleus	transcription regulator		tributyrin, belinostat, pyroxamide, romidepsin	10014	15184	84580
HDL	--	--		2	Plasma Membrane	complex
hemoglobin	--	--		2	Other	complex	diagnosis,efficacy,prognosis,safety,unspecified application	sodium nitrite/sodium thiosulfate, sodium nitrite
heparan sulfate	--	--			Other	chemical - endogenous mammalian
HERC6	HECT and RLD domain containing E3 ubiquitin protein ligase family member 6	--		9	Cytoplasm	enzyme			55008	67138	362376
hexachlorobenzene	--	--			Other	chemical toxicant
hexarelin	--	--			Other	chemical toxicant
HEXB	hexosaminidase B (beta polypeptide)	--		13	Cytoplasm	enzyme			3074	15212	294673
HEYL	hes-related family bHLH transcription factor with YRPW motif-like	--			Nucleus	transcription regulator	diagnosis,prognosis		26508	56198	313575
Hg2+	--	--			Other	chemical - endogenous non-mammalian
HIF1A	hypoxia inducible factor 1, alpha subunit (basic helix-loop-helix transcription factor)	--			Nucleus	transcription regulator	diagnosis,efficacy,prognosis,response to therapy		3091	15251	29560
HISTONE	--	--		4	Nucleus	group
Histone h3	--	--		10	Nucleus	group	efficacy
Histone h4	--	--		10	Nucleus	group	efficacy
HLA-DR	--	--		4	Plasma Membrane	complex	efficacy,prognosis
HLA-DRA	major histocompatibility complex, class II, DR alpha	--	1.766	4	Plasma Membrane	transmembrane receptor			3122	100504404	294269
Hmgn3	high mobility group nucleosomal binding domain 3	--			Nucleus	other				94353
HN	--	--			Other	other
HNF4A	hepatocyte nuclear factor 4, alpha	--			Nucleus	transcription regulator	unspecified application		3172	15378	25735
HNRNPA2B1	heterogeneous nuclear ribonucleoprotein A2/B1	--			Nucleus	other			3181	53379	362361
HNRNPU	heterogeneous nuclear ribonucleoprotein U (scaffold attachment factor A)	--	1.343	1	Nucleus	transporter	unspecified application		3192	51810	117280
homocysteine	--	--			Other	chemical - endogenous mammalian
HOXA9	homeobox A9	--			Nucleus	transcription regulator	diagnosis		3205	15405	297099|100909740|100911710
HRAS	Harvey rat sarcoma viral oncogene homolog	--			Plasma Membrane	enzyme	prognosis,safety		3265	15461	293621
HS3ST1	heparan sulfate (glucosamine) 3-O-sulfotransferase 1	--		11	Cytoplasm	enzyme			9957	15476	84406
HSD17B4	hydroxysteroid (17-beta) dehydrogenase 4	--			Cytoplasm	enzyme			3295	15488	79244
HSF2	heat shock transcription factor 2	--			Nucleus	transcription regulator			3298	15500	64441
HSP	--	--		4	Cytoplasm	group
Hsp70	--	--		4	Cytoplasm	group	unspecified application
Hsp90	--	--		4	Cytoplasm	group
HSP90AA1	heat shock protein 90kDa alpha (cytosolic), class A member 1	--		9	Cytoplasm	enzyme	safety,unspecified application	alvespimycin, retaspimycin, luminespib, cisplatin	3320	15519	299331
HSPB3	heat shock 27kDa protein 3	--		9	Cytoplasm	other			8988	56534	78951
HSPH1	heat shock 105kDa/110kDa protein 1	--	-1.817	9	Cytoplasm	other			10808	15505	288444
HTR2A	5-hydroxytryptamine (serotonin) receptor 2A, G protein-coupled	--		13	Plasma Membrane	G-protein coupled receptor		paliperidone, risperidone, buspirone, caffeine/ergotamine, iloperidone, eplivanserin, blonanserin, flibanserin, asenapine, ocaperidone, abaperidone, psilocybine, APD125, thioproperazine, lurasidone, opipramol, paliperidone palmitate, cinitapride, pipothiazine, amitriptyline/ketamine, chloropromazine, trazodone, flupenthixol, cisapride, chlorprothixene, clozapine, doxepin, desipramine, cyproheptad…	3356	15558	29595
HTT	huntingtin	--			Cytoplasm	transcription regulator	unspecified application		3064	15194	29424
hydrogen peroxide	--	--			Other	chemical - endogenous mammalian	diagnosis
IBSP	integrin-binding sialoprotein	--			Extracellular Space	other	efficacy		3381	15891	24477
ICMT	isoprenylcysteine carboxyl methyltransferase	--			Cytoplasm	enzyme			23463	57295	170818
IFI16	interferon, gamma-inducible protein 16	--			Nucleus	transcription regulator	unspecified application		3428	100504287|545384|15951|226691|236312|15950|102639543|100033459|100040462|226695|381308|623121	304988
IFI27	interferon, alpha-inducible protein 27	--		12	Cytoplasm	other			3429
IFITM1	interferon induced transmembrane protein 1	--		13	Plasma Membrane	transmembrane receptor			8519
Ifn	--	--		10	Extracellular Space	group
IFNE	interferon, epsilon	--		13	Extracellular Space	cytokine			338376	230405	298225
IFNG	interferon, gamma	--			Extracellular Space	cytokine	diagnosis,efficacy,response to therapy,unspecified application		3458	15978	25712
IFNK	interferon, kappa	--		13	Extracellular Space	cytokine			56832	387510	313152
IFRD1	interferon-related developmental regulator 1	--	-1.606	9	Nucleus	other			3475	15982	29596
Iga	--	--		10	Extracellular Space	complex	efficacy,unspecified application
IGF1	insulin-like growth factor 1 (somatomedin C)	--			Extracellular Space	growth factor	diagnosis,efficacy,prognosis,safety		3479	16000	24482
IGF1R	insulin-like growth factor 1 receptor	--			Plasma Membrane	transmembrane receptor	diagnosis,efficacy,prognosis	linsitinib, cixutumumab, ganitumab, AVE1642, BIIB022, IGF1, ceritinib	3480	16001	25718
IgG	--	--		2	Extracellular Space	complex	efficacy,prognosis
IgG1	--	--		13	Other	complex	unspecified application
Ighg2b	immunoglobulin heavy constant gamma 2B	--		13	Extracellular Space	other				16016
Igm	--	--		10	Extracellular Space	complex	efficacy
IK	IK cytokine, down-regulator of HLA II	--			Extracellular Space	cytokine			3550	24010	291659
IKZF1	IKAROS family zinc finger 1 (Ikaros)	--	2.098	10	Nucleus	transcription regulator	efficacy		10320	22778
IL1	--	--		6	Extracellular Space	group	efficacy,prognosis,response to therapy	rilonacept
IL3	interleukin 3	--			Extracellular Space	cytokine			3562
IL5	interleukin 5	--			Extracellular Space	cytokine	diagnosis,efficacy,response to therapy		3567	16191	24497
IL19	interleukin 19	--		13	Extracellular Space	cytokine			29949	329244	681145
IL26	interleukin 26	--		13	Extracellular Space	cytokine			55801
IL12 (complex)	--	--		10	Extracellular Space	complex	diagnosis,efficacy,prognosis
IL12 (family)	--	--		10	Extracellular Space	group
IL13RA1	interleukin 13 receptor, alpha 1	--		7	Plasma Membrane	transmembrane receptor		cintredekin besudotox	3597	16164	100360218|252963
IL17D	interleukin 17D	--		13	Extracellular Space	other			53342	239114
IL21R	interleukin 21 receptor	--		13	Plasma Membrane	transmembrane receptor			50615	60504	308977
IL27RA	interleukin 27 receptor, alpha	--		13	Plasma Membrane	transmembrane receptor			9466	50931	288905
ILF2	interleukin enhancer binding factor 2	--	1.523	1	Nucleus	transcription regulator			3608	67781
ILF3	interleukin enhancer binding factor 3, 90kDa	--			Nucleus	transcription regulator			3609	16201	84472
ILX-23-7553	--	--			Other	chemical drug
imidapril	--	--			Other	chemical drug
Immunoglobulin	--	--		10	Extracellular Space	complex	unspecified application
Importin beta	--	--		5	Nucleus	group
ingenol-dibenzoate	--	--			Other	chemical reagent
INSR	insulin receptor	--			Plasma Membrane	kinase	prognosis	insulin detemir, INS, canakinumab/INS, insulin aspart/insulin detemir, ceritinib, insulin glargine/insulin lispro, insulin aspart, insulin glulisine, insulin lispro, insulin glargine, protamine zinc insulin	3643	16337	24954
Insulin	--	--		6	Extracellular Space	group
Integrin	--	--		5	Plasma Membrane	complex
Integrin alpha 3 beta 1	--	--		12	Plasma Membrane	complex
Integrinα	--	--			Plasma Membrane	group
Interferon alpha	--	--		12	Extracellular Space	group	unspecified application
interferon beta-1a	--	--			Other	biologic drug
IQGAP1	IQ motif containing GTPase activating protein 1	--			Cytoplasm	other			8826	29875	361598
IRF4	interferon regulatory factor 4	--			Nucleus	transcription regulator	efficacy		3662	16364	291100
ITGB2	integrin, beta 2 (complement component 3 receptor 3 and 4 subunit)	--	1.661	12	Plasma Membrane	transmembrane receptor			3689	16414	309684
IVNS1ABP	influenza virus NS1A binding protein	--		8	Nucleus	other			10625	117198	289089
JAK2	Janus kinase 2	--			Cytoplasm	kinase	efficacy,prognosis	tofacitinib, ruxolitinib	3717	16452	24514
JAM2	junctional adhesion molecule 2	--		12	Plasma Membrane	other			58494	67374	619374
Jnk	--	--		1	Cytoplasm	group
JUN	jun proto-oncogene	--			Nucleus	transcription regulator	prognosis		3725	16476	24516
KCTD8	potassium channel tetramerization domain containing 8	--	1.557	9	Other	other			386617	243043	364148
KHDRBS1	KH domain containing, RNA binding, signal transduction associated 1	--			Nucleus	transcription regulator			10657	20218	117268
KHDRBS2	KH domain containing, RNA binding, signal transduction associated 2	--			Nucleus	other			202559	170771	170843
KIF21A	kinesin family member 21A	--		7	Cytoplasm	other			55605	16564	300158
KLF2	Kruppel-like factor 2	--			Nucleus	transcription regulator			10365	16598	306330
KLHDC3	kelch domain containing 3	--	1.444	8	Cytoplasm	other			116138	71765	363192
KPNA1	karyopherin alpha 1 (importin alpha 5)	--			Nucleus	transporter			3836	16646	288064
KRAS	Kirsten rat sarcoma viral oncogene homolog	--			Cytoplasm	enzyme	diagnosis,efficacy,prognosis,response to therapy,unspecified application		3845	16653	24525
LAMA3	laminin, alpha 3	--		12	Extracellular Space	other	diagnosis		3909	16774	307582
LAMB2	laminin, beta 2 (laminin S)	--	-1.778	6	Extracellular Space	enzyme			3913	16779	25473
LAMC2	laminin, gamma 2	--	-1.617	10	Extracellular Space	other	diagnosis		3918	16782	192362
Laminin	--	--		3	Extracellular Space	complex
LANCL1	LanC lantibiotic synthetase component C-like 1 (bacterial)	--	-1.434	1	Plasma Membrane	other			10314	14768	114515
LAS1L	LAS1-like (S. cerevisiae)	--		7	Nucleus	other			81887	76130	296865
latrunculin A	--	--			Other	chemical toxicant
LDL	--	--		2	Plasma Membrane	complex	efficacy,unspecified application
lenalidomide	--	--			Other	chemical drug
LEPRE1	leucine proline-enriched proteoglycan (leprecan) 1	--	1.319	7	Nucleus	enzyme			64175	56401	114200
LG100268	--	--			Other	chemical reagent
LGALS8	lectin, galactoside-binding, soluble, 8	--	1.375	3	Extracellular Space	other			3964	56048	116641
Lh	--	--		3	Plasma Membrane	complex
LHX1	LIM homeobox 1	--			Nucleus	transcription regulator			3975	16869	257634
linoleic acid	--	--			Other	chemical - endogenous mammalian
linolenic acid	--	--			Other	chemical - endogenous mammalian
lipid A	--	--			Other	chemical toxicant
lipopolysaccharide	--	--			Other	chemical drug
LLGL2	lethal giant larvae homolog 2 (Drosophila)	--		9	Cytoplasm	other			3993	217325	360661
LMNB1	lamin B1	--			Nucleus	other			4001	16906	116685
lomustine	--	--			Other	chemical drug
LPHN2	latrophilin 2	--	1.686	12	Plasma Membrane	G-protein coupled receptor			23266	99633	171447
LPL	lipoprotein lipase	--			Cytoplasm	enzyme	efficacy,unspecified application	atorvastatin/niacin, nicotinic acid/pioglitazone, nicotinic acid, tyloxapol, lovastatin/niacin	4023	16956	24539
LRP8	low density lipoprotein receptor-related protein 8, apolipoprotein e receptor	--			Plasma Membrane	transmembrane receptor			7804	16975	362558
LRRC4	leucine rich repeat containing 4	--			Plasma Membrane	other			64101	192198	641521
LSM8	LSM8 homolog, U6 small nuclear RNA associated (S. cerevisiae)	--		7	Nucleus	other			51691	76522	296913
LTBR	lymphotoxin beta receptor (TNFR superfamily, member 3)	--			Plasma Membrane	transmembrane receptor			4055	17000	297604
LTC4S	leukotriene C4 synthase	--		13	Cytoplasm	enzyme	efficacy		4056	17001	114097
LYN	v-yes-1 Yamaguchi sarcoma viral related oncogene homolog	--	1.626	2	Cytoplasm	kinase		bosutinib	4067	17096	81515
Mac1	--	--		3	Plasma Membrane	complex
MAN2C1	mannosidase, alpha, class 2C, member 1	--	1.478	2	Cytoplasm	enzyme			4123	73744	246136
mannose	--	--			Other	chemical - endogenous mammalian
Mapk	--	--		6	Cytoplasm	group	diagnosis,disease progression,efficacy,prognosis,response to therapy
MAPT	microtubule-associated protein tau	--			Plasma Membrane	other	diagnosis,efficacy,unspecified application		4137	17762	29477
MAT1A	methionine adenosyltransferase I, alpha	--			Cytoplasm	enzyme			4143	11720	25331
MATK	megakaryocyte-associated tyrosine kinase	--		12	Cytoplasm	kinase			4145	17179	60450
MAX	MYC associated factor X	--			Nucleus	transcription regulator			4149	17187	60661
MCFD2	multiple coagulation factor deficiency 2	--	1.422	6	Cytoplasm	other			90411	193813	246117
MDC1	mediator of DNA-damage checkpoint 1	--			Nucleus	other			9656	240087	309595
ME2	malic enzyme 2, NAD(+)-dependent, mitochondrial	--	1.339	11	Cytoplasm	enzyme			4200	107029	307270
MED13	mediator complex subunit 13	--			Nucleus	transcription regulator			9969	327987	303403
Mek	--	--		10	Cytoplasm	group	efficacy,safety	PD 0325901, selumetinib
MEMO1	mediator of cell motility 1	--	1.661	3	Cytoplasm	other			51072	76890	298787
methapyrilene	--	--			Other	chemical drug
methylnitrosourea	--	--			Other	chemical toxicant
methylprednisolone	--	--			Other	chemical drug
metribolone	--	--			Other	chemical reagent
MGEA5	meningioma expressed antigen 5 (hyaluronidase)	--			Cytoplasm	enzyme			10724	76055	154968
MGST1	microsomal glutathione S-transferase 1	--	1.431	6	Cytoplasm	enzyme			4257	56615	171341
MHC Class I (complex)	--	--		5	Plasma Membrane	complex
MHC Class II (complex)	--	--		10	Plasma Membrane	complex
MHC II	--	--		13	Other	group
Mi2	--	--		10	Nucleus	group
mibefradil	--	--			Other	chemical drug
mibolerone	--	--			Other	chemical drug
MIF	macrophage migration inhibitory factor (glycosylation-inhibiting factor)	--	1.430	10	Extracellular Space	cytokine	diagnosis,prognosis,response to therapy		4282	17319	81683
mir-29	microRNA 29a	--			Cytoplasm	microRNA	unspecified application		407024|407026|407021|407025	387222|387223|387224|723963	100314187|100314230|100314008|100314007
mir-383	microRNA 383	--			Cytoplasm	microRNA			494332	723860	100314072
miR-1 (and other miRNAs w/seed GGAAUGU)	--	--			Cytoplasm	mature microRNA
miR-101-3p (and other miRNAs w/seed ACAGUAC)	--	--			Cytoplasm	mature microRNA
miR-1260a (and other miRNAs w/seed UCCCACC)	--	--			Cytoplasm	mature microRNA
miR-1270 (and other miRNAs w/seed UGGAGAU)	--	--			Cytoplasm	mature microRNA
miR-1273h-5p (and other miRNAs w/seed UGGGAGG)	--	--			Cytoplasm	mature microRNA
miR-1277-3p (and other miRNAs w/seed ACGUAGA)	--	--			Cytoplasm	mature microRNA
miR-1278 (miRNAs w/seed AGUACUG)	--	--			Cytoplasm	mature microRNA
miR-128-3p (and other miRNAs w/seed CACAGUG)	--	--			Cytoplasm	mature microRNA
miR-1284 (and other miRNAs w/seed CUAUACA)	--	--			Cytoplasm	mature microRNA
miR-129-5p (miRNAs w/seed UUUUUGC)	--	--			Cytoplasm	mature microRNA
miR-130a-3p (and other miRNAs w/seed AGUGCAA)	--	--			Cytoplasm	mature microRNA	unspecified application
miR-139-5p (miRNAs w/seed CUACAGU)	--	--			Cytoplasm	mature microRNA
miR-142-3p (miRNAs w/seed GUAGUGU)	--	--			Cytoplasm	mature microRNA	unspecified application
miR-144-3p (miRNAs w/seed ACAGUAU)	--	--			Cytoplasm	mature microRNA
miR-1537-3p (miRNAs w/seed AAACCGU)	--	--			Cytoplasm	mature microRNA
miR-1910-5p (miRNAs w/seed CAGUCCU)	--	--			Cytoplasm	mature microRNA
miR-193a-3p (and other miRNAs w/seed ACUGGCC)	--	--			Cytoplasm	mature microRNA
miR-197-3p (and other miRNAs w/seed UCACCAC)	--	--			Cytoplasm	mature microRNA	unspecified application
miR-199a-3p (and other miRNAs w/seed CAGUAGU)	--	--			Cytoplasm	mature microRNA
miR-219b-5p (and other miRNAs w/seed GAUGUCC)	--	--			Cytoplasm	mature microRNA
miR-2278 (miRNAs w/seed AGAGCAG)	--	--			Cytoplasm	mature microRNA
miR-2355-5p (miRNAs w/seed UCCCCAG)	--	--		11	Cytoplasm	mature microRNA
miR-2682-5p (and other miRNAs w/seed AGGCAGU)	--	--			Cytoplasm	mature microRNA
miR-27a-3p (and other miRNAs w/seed UCACAGU)	--	--			Cytoplasm	mature microRNA
miR-3074-5p (miRNAs w/seed UUCCUGC)	--	--			Cytoplasm	mature microRNA
miR-30a-3p (and other miRNAs w/seed UUUCAGU)	--	--			Cytoplasm	mature microRNA
miR-3174 (miRNAs w/seed AGUGAGU)	--	--			Cytoplasm	mature microRNA
miR-3187-3p (miRNAs w/seed UGGCCAU)	--	--			Cytoplasm	mature microRNA
miR-324-5p (miRNAs w/seed GCAUCCC)	--	--			Cytoplasm	mature microRNA	unspecified application
miR-335-5p (and other miRNAs w/seed CAAGAGC)	--	--			Cytoplasm	mature microRNA	unspecified application
miR-3621 (miRNAs w/seed GCGGGUC)	--	--			Cytoplasm	mature microRNA
miR-3691-3p (miRNAs w/seed CCAAGUC)	--	--			Cytoplasm	mature microRNA
miR-421-3p (and other miRNAs w/seed UCAACAG)	--	--			Cytoplasm	mature microRNA
miR-4278 (miRNAs w/seed UAGGGGG)	--	--			Cytoplasm	mature microRNA
miR-4292 (and other miRNAs w/seed CCCUGGG)	--	--			Cytoplasm	mature microRNA
miR-4307 (miRNAs w/seed AUGUUUU)	--	--			Cytoplasm	mature microRNA
miR-431-3p (miRNAs w/seed AGGUCGU)	--	--			Cytoplasm	mature microRNA
miR-4317 (miRNAs w/seed CAUUGCC)	--	--			Cytoplasm	mature microRNA
miR-4323 (miRNAs w/seed AGCCCCA)	--	--			Cytoplasm	mature microRNA
miR-4325 (miRNAs w/seed UGCACUU)	--	--			Cytoplasm	mature microRNA
miR-433-3p (miRNAs w/seed UCAUGAU)	--	--			Cytoplasm	mature microRNA	unspecified application
miR-4461 (miRNAs w/seed AUUGAGA)	--	--			Cytoplasm	mature microRNA
miR-4468 (miRNAs w/seed GAGCAGA)	--	--			Cytoplasm	mature microRNA
miR-4474-3p (miRNAs w/seed UGUGGCU)	--	--			Cytoplasm	mature microRNA
miR-4487 (miRNAs w/seed GAGCUGG)	--	--			Cytoplasm	mature microRNA
miR-450b-3p (and other miRNAs w/seed UGGGAUC)	--	--			Cytoplasm	mature microRNA	unspecified application
miR-451b (miRNAs w/seed AGCAAGA)	--	--			Cytoplasm	mature microRNA
miR-4648 (miRNAs w/seed GUGGGAC)	--	--			Cytoplasm	mature microRNA
miR-4671-3p (miRNAs w/seed UAGUGCA)	--	--			Cytoplasm	mature microRNA
miR-4682 (miRNAs w/seed CUGAGUU)	--	--			Cytoplasm	mature microRNA
miR-4690-3p (and other miRNAs w/seed CAGCCCA)	--	--			Cytoplasm	mature microRNA
miR-4690-5p (miRNAs w/seed AGCAGGC)	--	--			Cytoplasm	mature microRNA
miR-4701-5p (and other miRNAs w/seed UGGCCAC)	--	--			Cytoplasm	mature microRNA
miR-4714-5p (and other miRNAs w/seed ACUCUGA)	--	--			Cytoplasm	mature microRNA
miR-4716-3p (and other miRNAs w/seed AGGGGGA)	--	--			Cytoplasm	mature microRNA
miR-4731-3p (and other miRNAs w/seed ACACAAG)	--	--			Cytoplasm	mature microRNA
miR-495-3p (and other miRNAs w/seed AACAAAC)	--	--			Cytoplasm	mature microRNA
miR-510-5p (miRNAs w/seed ACUCAGG)	--	--			Cytoplasm	mature microRNA
miR-541-3p (and other miRNAs w/seed GGUGGGC)	--	--			Cytoplasm	mature microRNA	unspecified application
miR-542-3p (miRNAs w/seed GUGACAG)	--	--			Cytoplasm	mature microRNA
miR-544-3p (and other miRNAs w/seed UUCUGCA)	--	--			Cytoplasm	mature microRNA
miR-548aa (and other miRNAs w/seed AAAACCA)	--	--			Cytoplasm	mature microRNA
miR-548u (and other miRNAs w/seed AAAGACU)	--	--			Cytoplasm	mature microRNA
miR-562 (miRNAs w/seed AAGUAGC)	--	--			Cytoplasm	mature microRNA
miR-567 (miRNAs w/seed GUAUGUU)	--	--			Cytoplasm	mature microRNA
miR-595 (miRNAs w/seed AAGUGUG)	--	--			Cytoplasm	mature microRNA
miR-605-5p (miRNAs w/seed AAAUCCC)	--	--			Cytoplasm	mature microRNA
miR-626 (and other miRNAs w/seed GCUGUCU)	--	--			Cytoplasm	mature microRNA
miR-638 (miRNAs w/seed GGGAUCG)	--	--			Cytoplasm	mature microRNA	unspecified application
miR-645 (miRNAs w/seed CUAGGCU)	--	--			Cytoplasm	mature microRNA
miR-660-5p (and other miRNAs w/seed ACCCAUU)	--	--			Cytoplasm	mature microRNA
miR-676-3p (miRNAs w/seed UGUCCUA)	--	--			Cytoplasm	mature microRNA
miR-758-5p (and other miRNAs w/seed GGUUGAC)	--	--			Cytoplasm	mature microRNA
miR-875-3p (miRNAs w/seed CUGGAAA)	--	--			Cytoplasm	mature microRNA
miR-92a-3p (and other miRNAs w/seed AUUGCAC)	--	--		11	Cytoplasm	mature microRNA	unspecified application
Mitochondrial complex 1	--	--		11	Cytoplasm	complex
MLEC	malectin	--	1.416	8	Plasma Membrane	other			9761	109154	304543
MLF2	myeloid leukemia factor 2	--		9	Nucleus	other			8079	30853	312709
MLYCD	malonyl-CoA decarboxylase	--			Cytoplasm	enzyme			23417	56690	85239
Mmp	--	--		6	Nucleus	group
MMP14	matrix metallopeptidase 14 (membrane-inserted)	--			Extracellular Space	peptidase	diagnosis,prognosis,unspecified application	marimastat	4323	17387	81707
mono-(2-ethylhexyl)phthalate	--	--			Other	chemical toxicant
MPST	mercaptopyruvate sulfurtransferase	--	-1.696	7	Cytoplasm	enzyme			4357	246221	192172
MRPL45	mitochondrial ribosomal protein L45	--		11	Cytoplasm	other			84311	67036	287656
MSMB	microseminoprotein, beta-	--	1.453	3,11	Extracellular Space	other			4477	17695	29311
Mt2	metallothionein 2	--		13	Other	other				17750
MT-ND4	NADH dehydrogenase, subunit 4 (complex I)	--		11	Cytoplasm	enzyme	unspecified application		4538	17719	26201
MT-ND4L	NADH dehydrogenase, subunit 4L (complex I)	--		11	Cytoplasm	enzyme			4539	17720	26200
MTPN	myotrophin	--			Nucleus	transcription regulator			136319	14489	79215
MTR	5-methyltetrahydrofolate-homocysteine methyltransferase	--		7	Cytoplasm	enzyme		hydroxocobalamin, cyanocobalamin	4548	238505	81522
MTRR	5-methyltetrahydrofolate-homocysteine methyltransferase reductase	--	1.435	7	Cytoplasm	enzyme			4552	210009	290947
MXRA7	matrix-remodelling associated 7	--	1.484	8	Other	other			439921
MYC	v-myc avian myelocytomatosis viral oncogene homolog	--			Nucleus	transcription regulator	diagnosis,efficacy,prognosis,response to therapy,unspecified application		4609	17869	24577
MYCN	v-myc avian myelocytomatosis viral oncogene neuroblastoma derived homolog	--			Nucleus	transcription regulator	diagnosis,prognosis		4613	18109	298894
MYH6	myosin, heavy chain 6, cardiac muscle, alpha	--	1.443	2	Cytoplasm	enzyme			4624	17888	29556
MYH8	myosin, heavy chain 8, skeletal muscle, perinatal	--		9	Cytoplasm	enzyme			4626	17885	252942
MYO1F	myosin IF	--	1.759	8	Cytoplasm	other			4542	17916	314654
MYO9B	myosin IXB	--		9	Cytoplasm	enzyme			4650	17925	25486
myrcene	--	--			Other	chemical - endogenous non-mammalian
myristoylated Protein Kinase C peptide inhibitor	--	--			Other	chemical - kinase inhibitor
N-acetylmuramyl-L-alanyl-D-isoglutamine	--	--			Other	chemical - endogenous non-mammalian
N-formyl-Met-Leu-Phe	--	--			Other	chemical reagent
n-nitrosomethylbenzylamine	--	--			Other	chemical toxicant
Na-k-atpase	--	--		2	Other	group
NADPH oxidase	--	--		2	Plasma Membrane	complex
nafenopin	--	--			Other	chemical drug
NBN	nibrin	--			Nucleus	other	diagnosis,efficacy		4683	27354	85482
NCAM1	neural cell adhesion molecule 1	--			Plasma Membrane	other	efficacy,prognosis	BB-10901	4684	17967	24586
NCF1	neutrophil cytosolic factor 1	--	1.585	2	Cytoplasm	enzyme	efficacy		653361	17969	114553
NCKIPSD	NCK interacting protein with SH3 domain	--	1.482	5	Other	other			51517	80987	301009
NDRG1	N-myc downstream regulated 1	--	-1.552	1	Nucleus	kinase			10397	17988	299923
NDUFA4L2	NADH dehydrogenase (ubiquinone) 1 alpha subcomplex, 4-like 2	--	1.732	11	Other	enzyme			56901	407790	100362331
NDUFAF1	NADH dehydrogenase (ubiquinone) complex I, assembly factor 1	--		11	Cytoplasm	other			51103	69702	296086
NDUFB7	NADH dehydrogenase (ubiquinone) 1 beta subcomplex, 7, 18kDa	--		11	Cytoplasm	enzyme			4713	66916	361385
NDUFS4	NADH dehydrogenase (ubiquinone) Fe-S protein 4, 18kDa (NADH-coenzyme Q reductase)	--	1.324	11	Cytoplasm	enzyme			4724	17993	499529
NDUFV3	NADH dehydrogenase (ubiquinone) flavoprotein 3, 10kDa	--		11	Cytoplasm	enzyme			4731	78330	64539
NFAT (complex)	--	--		4	Cytoplasm	complex
NFE2L2	nuclear factor, erythroid 2-like 2	--			Nucleus	transcription regulator	efficacy		4780	18024	83619
NFkB (complex)	--	--		4	Nucleus	complex	diagnosis,disease progression,efficacy,prognosis
NFYA	nuclear transcription factor Y, alpha	--			Nucleus	transcription regulator			4800	18044	29508
NFYC	nuclear transcription factor Y, gamma	--			Nucleus	transcription regulator			4802	18046	25337
nickel subsulfide	--	--			Other	chemical toxicant
nilvadipine	--	--			Other	chemical drug
nitric oxide	--	--			Other	chemical - endogenous mammalian	diagnosis,efficacy
nitrofurantoin	--	--			Other	chemical drug
NKX2-1	NK2 homeobox 1	--			Nucleus	transcription regulator	unspecified application		7080	21869	25628
NOL9	nucleolar protein 9	--	1.834	7	Nucleus	other			79707	74035	313744
NOLC1	nucleolar and coiled-body phosphoprotein 1	--	1.332	1	Nucleus	transcription regulator			9221		64896
NOMO1 (includes others)	NODAL modulator 1	--	1.338	10	Plasma Membrane	other			23420|408050|283820	211548	361578
Nr1h	--	--		2	Nucleus	group
NR1I2	nuclear receptor subfamily 1, group I, member 2	--			Nucleus	ligand-dependent nuclear receptor		erlotinib/vismodegib, erlotinib/gemcitabine, capecitabine/erlotinib, cabozantinib/erlotinib, erlotinib	8856	18171	84385
NR2F6	nuclear receptor subfamily 2, group F, member 6	--		8	Nucleus	ligand-dependent nuclear receptor			2063	13864	245980
NR3C1	nuclear receptor subfamily 3, group C, member 1 (glucocorticoid receptor)	--			Nucleus	ligand-dependent nuclear receptor	efficacy	rimexolone, medrysone, clocortolone pivalate, diflorasone diacetate, fluorometholone, dexamethasone phosphate, cortisone acetate, halcinonide, flurandrenolide, desoximetasone, desonide, prednisolone, clobetasol propionate, fluocinolone acetonide, prednisone, hydrocortisone, triamcinolone, dexamethasone 21-acetate, 11beta hydrocortisone acetate, betamethasone, dexamethasone, budesonide, fluticason…	2908	14815	24413
NR3C2	nuclear receptor subfamily 3, group C, member 2	--			Nucleus	ligand-dependent nuclear receptor		fludrocortisone, drospirenone/ethinyl estradiol, hydrochlorothiazide/spironolactone, fludrocortisone acetate, drospirenone, spironolactone, eplerenone, progesterone	4306	110784	25672
NR4A1	nuclear receptor subfamily 4, group A, member 1	--			Nucleus	ligand-dependent nuclear receptor	unspecified application		3164	15370	79240
NRG1	neuregulin 1	--			Extracellular Space	growth factor	diagnosis,response to therapy		3084		112400
NRXN1	neurexin 1	--			Plasma Membrane	transporter			9378	18189	60391
NUBP1	nucleotide binding protein 1	--			Cytoplasm	other			4682	26425	287042
NUCKS1	nuclear casein kinase and cyclin-dependent kinase substrate 1	--	1.920	6	Nucleus	kinase			64710	98415	102546716|64709
NUP50	nucleoporin 50kDa	--	1.322	9	Nucleus	transporter			10762	18141	25497
NUP54	nucleoporin 54kDa	--		8,9	Nucleus	transporter			53371	269113	53372
NUPL1	nucleoporin like 1	--	-1.936	8	Nucleus	transporter			9818	71844	245922
OLA1	Obg-like ATPase 1	--		8	Cytoplasm	other			29789	67059	296488
oleic acid	--	--			Other	chemical - endogenous mammalian
OLFML3	olfactomedin-like 3	--	1.389	12	Extracellular Space	other			56944	99543	310743
ONECUT1	one cut homeobox 1	--			Nucleus	transcription regulator			3175	15379	25231
OSM	oncostatin M	--			Extracellular Space	cytokine	unspecified application		5008	18413	289747
oxophenylarsine	--	--			Other	chemical reagent
P38 MAPK	--	--		6	Cytoplasm	group
P4HA1	prolyl 4-hydroxylase, alpha polypeptide I	--	1.464	9	Cytoplasm	enzyme	unspecified application		5033	18451	64475
p85 (pik3r)	--	--		12	Cytoplasm	group
Pak	--	--		4	Cytoplasm	group
palmitic acid	--	--			Other	chemical - endogenous mammalian
PAPSS1	3'-phosphoadenosine 5'-phosphosulfate synthase 1	--	1.445	7	Cytoplasm	enzyme			9061	23971	295443
PAPSS2	3'-phosphoadenosine 5'-phosphosulfate synthase 2	--		7	Cytoplasm	enzyme			9060	23972	294103
PARP9	poly (ADP-ribose) polymerase family, member 9	--			Nucleus	enzyme			83666	80285	303905
Pb2+	--	--			Other	chemical reagent
PCYT2	phosphate cytidylyltransferase 2, ethanolamine	--			Cytoplasm	enzyme			5833	68671	89841
PCYT1A	phosphate cytidylyltransferase 1, choline, alpha	--		13	Cytoplasm	enzyme			5130	13026	140544
PD98059	--	--			Other	chemical - kinase inhibitor
PDE4B	phosphodiesterase 4B, cAMP-specific	--			Cytoplasm	enzyme		enprofylline, dyphylline, nitroglycerin, caffeine/ergotamine, arofylline, tetomilast, L 869298, ibudilast, aminophylline, anagrelide, cilomilast, milrinone, dipyridamole, L-826,141, ketotifen, roflumilast, tolbutamide, papaverine, theophylline, pentoxifylline, caffeine	5142	18578	24626
Pde4d	phosphodiesterase 4D, cAMP specific	--			Cytoplasm	enzyme				238871
Pdgf (complex)	--	--		6	Extracellular Space	complex	diagnosis,disease progression,efficacy,prognosis,response to therapy
PDGF BB	--	--		6	Extracellular Space	complex	efficacy,unspecified application
PDLIM2	PDZ and LIM domain 2 (mystique)	--			Cytoplasm	other			64236	213019	290354
PDLIM4	PDZ and LIM domain 4	--	1.488	8	Plasma Membrane	other	diagnosis		8572	30794	24915
PECAM1	platelet/endothelial cell adhesion molecule 1	--			Plasma Membrane	other	disease progression,efficacy,prognosis		5175	18613	29583
PELP1	proline, glutamate and leucine rich protein 1	--		7	Nucleus	other	response to therapy		27043	75273	360552
PEX7	peroxisomal biogenesis factor 7	--		8	Cytoplasm	transporter			5191	18634	308718
PFKFB1	6-phosphofructo-2-kinase/fructose-2,6-biphosphatase 1	--			Cytoplasm	kinase	unspecified application		5207	18639	24638
PFKFB2	6-phosphofructo-2-kinase/fructose-2,6-biphosphatase 2	--	-1.892	2	Cytoplasm	kinase			5208	18640	24640
PGM2	phosphoglucomutase 2	--	1.883	7	Cytoplasm	enzyme			55276	66681
PGR	progesterone receptor	--			Nucleus	ligand-dependent nuclear receptor	diagnosis,efficacy,response to therapy,unspecified application	misoprostol, dienogest, ulipristal acetate, asoprisnil, ethynodiol diacetate, norethindrone acetate, ethinyl estradiol/ethynodiol diacetate, estradiol cypionate/medroxyprogesterone acetate, tosagestin, estradiol/norethindrone acetate, ZK 230211, etonogestrel, nestorone, ethinyl estradiol/etonogestrel, leuprolide acetate/norethindrone acetate, megestrol acetate/tamoxifen, ethynodiol, desogestrel/e…	5241	18667	25154
phenacetin	--	--			Other	chemical drug
phenethyl isothiocyanate	--	--			Other	chemical drug
phenylbutazone	--	--			Other	chemical drug
phorbol myristate acetate	--	--			Other	chemical drug
phosphatase	--	--		6	Other	group
phosphatidylethanolamine	--	--			Other	chemical - endogenous mammalian
PI3K (complex)	--	--		10	Cytoplasm	complex
PI3K (family)	--	--		2	Other	group		buparlisib
PIAS1	protein inhibitor of activated STAT, 1	--			Nucleus	transcription regulator	unspecified application		8554	56469	300772
PIGR	polymeric immunoglobulin receptor	--		13	Plasma Membrane	transporter	unspecified application		5284	18703	25046
pioglitazone	--	--			Other	chemical drug
PIP5K1B	phosphatidylinositol-4-phosphate 5-kinase, type I, beta	--		13	Cytoplasm	kinase			8395	18719	309419
pirinixic acid	--	--			Other	chemical toxicant
PITHD1	PITH (C-terminal proteasome-interacting domain of thioredoxin-like) domain containing 1	--	1.551	7	Nucleus	other			57095	66193	298557
PITPNB	phosphatidylinositol transfer protein, beta	--	1.310	6	Cytoplasm	transporter			23760	56305	114561
Pka	--	--		6	Cytoplasm	complex
Pkc(s)	--	--		6	Cytoplasm	group	efficacy
PLAA	phospholipase A2-activating protein	--			Cytoplasm	other			9373	18786	116645
plicamycin	--	--			Other	chemical drug
Pln	phospholamban	--			Cytoplasm	other				18821	64672
PLN	phospholamban	--			Cytoplasm	transporter			5350
PLOD1	procollagen-lysine, 2-oxoglutarate 5-dioxygenase 1	--	2.230	9	Cytoplasm	enzyme			5351	18822	116552
PLS3	plastin 3	--	-1.842	3	Cytoplasm	other			5358	102866	81748
PML	promyelocytic leukemia	--			Nucleus	transcription regulator		arsenic trioxide	5371	18854	315713
PON2	paraoxonase 2	--	-2.136	2	Plasma Membrane	enzyme			5445	330260	296851
POR	P450 (cytochrome) oxidoreductase	--			Cytoplasm	enzyme		daunorubicin/tretinoin, cisplatin/doxorubicin/methotrexate, cisplatin/doxorubicin/ifosfamide/methotrexate, cisplatin/doxorubicin, carboplatin/doxorubicin, dacarbazine/doxorubicin, doxorubicin/ifosfamide, doxorubicin/streptozocin, dacarbazine/doxorubicin/ifosfamide, doxorubicin/tretinoin, nitazoxanide, doxorubicin, daunorubicin	5447	18984	29441
PP2A	--	--		5	Cytoplasm	complex
PPARA	peroxisome proliferator-activated receptor alpha	--			Nucleus	ligand-dependent nuclear receptor	diagnosis	choline fenofibrate, aleglitazar, choline fenofibrate/simvastatin, ezetimibe/fenofibrate, NS-220, tesaglitazar, bezafibrate, clofibrate, fenofibrate, docosahexaenoic acid, gemfibrozil	5465	19013	25747
PPARD	peroxisome proliferator-activated receptor delta	--			Nucleus	ligand-dependent nuclear receptor	diagnosis	treprostinil, icosapent, GW501516, bezafibrate	5467	19015	25682
PPARG	peroxisome proliferator-activated receptor gamma	--			Nucleus	ligand-dependent nuclear receptor	diagnosis,efficacy,unspecified application	icosapent, amlodipine/telmisartan, aleglitazar, aspirin/dipyridamole/telmisartan, clopidogrel/telmisartan, glimepiride/rosiglitazone, nicotinic acid/pioglitazone, alogliptin/pioglitazone, rosiglitazone, farglitazar, sulfasalazine, pioglitazone, telmisartan, tesaglitazar, troglitazone, hydrochlorothiazide/telmisartan, balsalazide, mesalamine, bezafibrate	5468	19016	25664
PPARGC1A	peroxisome proliferator-activated receptor gamma, coactivator 1 alpha	--			Nucleus	transcription regulator	diagnosis,efficacy		10891	19017	83516
PPIE	peptidylprolyl isomerase E (cyclophilin E)	--	1.631	9	Nucleus	enzyme			10450	56031
PPP1R3A	protein phosphatase 1, regulatory subunit 3A	--			Cytoplasm	phosphatase	unspecified application		5506	140491	500036
PRKAA	--	--		2	Cytoplasm	group
PRKRIP1	PRKR interacting protein 1 (IL11 inducible)	--	1.376	11	Nucleus	other			79706	66801	498171
PRL	prolactin	--			Extracellular Space	cytokine	diagnosis,efficacy,safety		5617	19109	24683
PRMT6	protein arginine methyltransferase 6	--			Nucleus	enzyme			55170	99890	295384|100911617
propofol	--	--			Other	chemical drug
PRR13	proline rich 13	--			Nucleus	other			54458
PSEN1	presenilin 1	--			Plasma Membrane	peptidase	diagnosis,unspecified application	tarenflurbil	5663	19164	29192
PSMC5	proteasome (prosome, macropain) 26S subunit, ATPase, 5	--			Nucleus	transcription regulator			5705	19184	81827
PSMD4	proteasome (prosome, macropain) 26S subunit, non-ATPase, 4	--			Cytoplasm	other	diagnosis,disease progression		5710	19185	83499
PSMD5	proteasome (prosome, macropain) 26S subunit, non-ATPase, 5	--	-1.436	4	Other	other			5711	66998	296651
PSMD14	proteasome (prosome, macropain) 26S subunit, non-ATPase, 14	--	1.396	4	Cytoplasm	peptidase			10213	59029	311078
PSTPIP2	proline-serine-threonine phosphatase interacting protein 2	--	1.664	2	Cytoplasm	other			9050	19201	307248
PTEN	phosphatase and tensin homolog	--			Cytoplasm	phosphatase	diagnosis,disease progression,efficacy,prognosis,response to therapy		5728	19211	50557
PTK2	protein tyrosine kinase 2	--			Cytoplasm	kinase	diagnosis,disease progression,efficacy,prognosis		5747	14083	25614
PTPN6	protein tyrosine phosphatase, non-receptor type 6	--			Cytoplasm	phosphatase			5777	15170	116689
PTPN22	protein tyrosine phosphatase, non-receptor type 22 (lymphoid)	--		13	Cytoplasm	phosphatase	unspecified application		26191	19260	295338
PTPRM	protein tyrosine phosphatase, receptor type, M	--	1.781	6	Plasma Membrane	phosphatase			5797	19274	29616
PVR	poliovirus receptor	--		12	Plasma Membrane	other			5817
pyridoxal phosphate-6-azophenyl-2',4'-disulfonic acid	--	--			Other	chemical reagent
Rab5	--	--		3	Cytoplasm	group
RAB12	RAB12, member RAS oncogene family	--	1.618	7	Cytoplasm	enzyme			201475	19328	25530
RAB1A	RAB1A, member RAS oncogene family	--	1.537	3	Cytoplasm	enzyme			5861	19324	81754
RAB5A	RAB5A, member RAS oncogene family	--	1.346	3	Cytoplasm	enzyme			5868	271457	64633
Rac	--	--		5	Cytoplasm	group
RAC2	ras-related C3 botulinum toxin substrate 2 (rho family, small GTP binding protein Rac2)	--			Cytoplasm	enzyme			5880	19354	366957
RACGAP1	Rac GTPase activating protein 1	--			Cytoplasm	transporter	unspecified application		29127	26934	315298|100909901
RAD51B	RAD51 paralog B	--		8	Nucleus	enzyme			5890	19363	500679
Raf	--	--		4	Cytoplasm	group	efficacy
RAG2	recombination activating gene 2	--		13	Nucleus	enzyme			5897	19374	295953
raloxifene	--	--			Other	chemical drug
RARB	retinoic acid receptor, beta	--			Nucleus	ligand-dependent nuclear receptor	diagnosis,efficacy,prognosis	etretinate, daunorubicin/tretinoin, idarubicin/tretinoin, doxorubicin/tretinoin, adapalene, isotretinoin, tazarotene, acitretin, tretinoin, tamibarotene, alitretinoin, fenretinide	5915	218772	24706
Ras	--	--		12	Cytoplasm	group	diagnosis,efficacy,prognosis,response to therapy
Ras homolog	--	--		5	Cytoplasm	group
Rasgrf	--	--		12	Cytoplasm	group
RASGRF2	Ras protein-specific guanine nucleotide-releasing factor 2	--		12	Cytoplasm	other			5924	19418	114513
RASSF9	Ras association (RalGDS/AF-6) domain family (N-terminal) member 9	--		9	Cytoplasm	transporter			9182	237504	65053
Rb	--	--		10	Nucleus	group
RBBP4	retinoblastoma binding protein 4	--	1.328	10	Nucleus	enzyme			5928	19646	313048
RBM17	RNA binding motif protein 17	--	-1.579	8	Nucleus	other			84991	76938	291295
RBM25	RNA binding motif protein 25	--	1.424	1	Nucleus	other			58517
RBM39	RNA binding motif protein 39	--	1.412	1	Nucleus	transcription regulator			9584	170791	100910882
RBMS1	RNA binding motif, single stranded interacting protein 1	--	1.679	9	Nucleus	other			5937	56878	362138
RCAN1	regulator of calcineurin 1	--			Nucleus	transcription regulator			1827	54720
RCE1	Ras converting CAAX endopeptidase 1	--			Cytoplasm	peptidase			9986	19671	309153
RCN1	reticulocalbin 1, EF-hand calcium binding domain	--	2.384	3	Cytoplasm	other			5954	19672	362182
RFX1	regulatory factor X, 1 (influences HLA class II expression)	--			Nucleus	transcription regulator	diagnosis		5989	19724	288906
RFX2	regulatory factor X, 2 (influences HLA class II expression)	--			Nucleus	transcription regulator			5990	19725	301121
RFX3	regulatory factor X, 3 (influences HLA class II expression)	--			Nucleus	transcription regulator			5991	19726
RFX4	regulatory factor X, 4 (influences HLA class II expression)	--			Nucleus	transcription regulator			5992	71137
Rfx5	regulatory factor X, 5 (influences HLA class II expression)	--			Other	other				53970
RFXANK	regulatory factor X-associated ankyrin-containing protein	--			Nucleus	transcription regulator			8625	19727	306353
RHOH	ras homolog family member H	--			Plasma Membrane	enzyme			399	74734	305341
Ribosomal 40s subunit	--	--		1	Cytoplasm	complex
RICTOR	RPTOR independent companion of MTOR, complex 2	--			Cytoplasm	other			253260	78757	310131
ristocetin	--	--			Other	chemical toxicant
RNA polymerase II	--	--		10	Nucleus	complex
RNF20	ring finger protein 20, E3 ubiquitin protein ligase	--	-1.432	4	Nucleus	enzyme			56254	109331	313216
RNF213	ring finger protein 213	--		9	Cytoplasm	enzyme			57674	672511	303735
RNPS1	RNA binding protein S1, serine-rich domain	--	1.601	1	Nucleus	other			10921	19826	287113
Rnr	--	--		1	Other	group
RORA	RAR-related orphan receptor A	--			Nucleus	ligand-dependent nuclear receptor			6095	19883	300807
RORC	RAR-related orphan receptor C	--			Nucleus	ligand-dependent nuclear receptor			6097	19885	102556141
rosiglitazone	--	--			Other	chemical drug
RPL7	ribosomal protein L7	--	1.326	1	Nucleus	transcription regulator			6129	19989	297755
RPL13	ribosomal protein L13	--	1.389	1	Cytoplasm	other			6137	270106|100040416	81765
RPL14	ribosomal protein L14	--	1.451	1	Cytoplasm	other			9045	67115	65043
RPL24	ribosomal protein L24	--	1.426	1	Cytoplasm	other			6152	68193	64307
RPL26	ribosomal protein L26	--	1.385	1	Cytoplasm	other			6154	19941	287417
RPL30	ribosomal protein L30	--	1.560	5	Cytoplasm	other			6156	19946	100362027|64640
RPL34	ribosomal protein L34	--	1.882	1	Cytoplasm	other			6164	623174	296870
RPL39	ribosomal protein L39	--		9	Cytoplasm	other			6170	67248	25347
RPL35A	ribosomal protein L35a	--	1.462	5	Cytoplasm	other			6165	57808	57809|100359498
RPL37A	ribosomal protein L37a	--	1.498	1	Cytoplasm	other			6168	19981	100361520
RPS5	ribosomal protein S5	--	1.907	1	Cytoplasm	other			6193	20103	25538
RPS8	ribosomal protein S8	--	1.434	1	Cytoplasm	other			6202	20116	65136
RPS19	ribosomal protein S19	--			Cytoplasm	other			6223	20085	100910336|29287
RPS4X	ribosomal protein S4, X-linked	--	1.476	1	Cytoplasm	other	diagnosis		6191
RRAGB	Ras-related GTP binding B	--		8	Cytoplasm	enzyme			10325	245670
RRM2	ribonucleotide reductase M2	--			Nucleus	enzyme		cytarabine/fludarabine phosphate, bortezomib/cladribine/rituximab, gemcitabine/paclitaxel, cyclophosphamide/fludarabine phosphate/rituximab, cladribine/cytarabine/daunorubicin, gemcitabine/oxaliplatin, gemcitabine/vinorelbine, docetaxel/gemcitabine, docetaxel/gemcitabine/vincristine, cladribine/cytarabine/filgrastim, capecitabine/gemcitabine, gemcitabine/oxaliplatin/paclitaxel, cytarabine/filgras…	6241	20135	362720|100359539
Rxr	--	--		10	Nucleus	group
S-18886	--	--			Other	chemical drug
S-nitrosoglutathione	--	--			Other	chemical toxicant
S100A6	S100 calcium binding protein A6	--	-2.121	3	Cytoplasm	transporter	diagnosis,unspecified application		6277	20200	85247
salsalate	--	--			Other	chemical drug
SAP30BP	SAP30 binding protein	--		8	Nucleus	transcription regulator			29115	57230	360662
Sapk	--	--		5	Nucleus	group
SCAP	SREBF chaperone	--			Cytoplasm	other			22937	235623	301024
SCAPER	S-phase cyclin A-associated protein in the ER	--	1.464	7	Extracellular Space	other			49855	244891
SDPR	serum deprivation response	--		12	Plasma Membrane	other			8436	20324	316384
SDR16C5	short chain dehydrogenase/reductase family 16C, member 5	--	-1.509	8	Cytoplasm	enzyme			195814	242285	297805
SEC23B	Sec23 homolog B (S. cerevisiae)	--	1.304	5	Extracellular Space	transporter			10483	27054	362226
SEC61A1	Sec61 alpha 1 subunit (S. cerevisiae)	--	1.638	9	Cytoplasm	transporter			29927	53421	80843
SEC61G	Sec61 gamma subunit	--		9	Plasma Membrane	transporter			23480	102637269|100043039|102640296|20335|102636652|100042561	499136
selenomethylselenocysteine	--	--			Other	chemical - endogenous mammalian
SEMA3C	sema domain, immunoglobulin domain (Ig), short basic domain, secreted, (semaphorin) 3C	--	1.331	3	Extracellular Space	other			10512	20348	296787
SEMA7A	semaphorin 7A, GPI membrane anchor (John Milton Hagen blood group)	--	1.426	2	Plasma Membrane	transmembrane receptor			8482	20361	315711
seocalcitol	--	--			Other	chemical drug
SEPT5	septin 5	--			Cytoplasm	enzyme			5413	18951	116728
SEPT7	septin 7	--	1.495	4	Cytoplasm	other			989	235072	64551
SERPINA1	serpin peptidase inhibitor, clade A (alpha-1 antiproteinase, antitrypsin), member 1	--	-1.658	2	Extracellular Space	other	diagnosis,unspecified application		5265	20703|20704|20702|20701|20700	24648
SERPINH1	serpin peptidase inhibitor, clade H (heat shock protein 47), member 1, (collagen binding protein 1)	--	1.456	6	Extracellular Space	other			871	12406	29345
SERTAD1	SERTA domain containing 1	--			Nucleus	transcription regulator	unspecified application		29950	55942	361526
SET	SET nuclear oncogene	--	1.422	6	Nucleus	phosphatase	prognosis		6418	56086	307947
SETBP1	SET binding protein 1	--			Nucleus	other			26040	240427	291423
Sfk	--	--		12	Other	group
SGSM3	small G protein signaling modulator 3	--	-1.470	3	Plasma Membrane	other			27352	105835	362963
SIAH2	siah E3 ubiquitin protein ligase 2	--			Nucleus	transcription regulator	efficacy		6478	20439	140593
Sik1	salt inducible kinase 1	--			Other	kinase				17691	59329
simvastatin	--	--			Other	chemical drug
sirolimus	--	--			Other	chemical drug
SLCO2A1	solute carrier organic anion transporter family, member 2A1	--	1.710	11	Plasma Membrane	transporter			6578	24059	24546
SLIT3	slit homolog 3 (Drosophila)	--			Extracellular Space	other			6586	20564	83467
SMARCA4	SWI/SNF related, matrix associated, actin dependent regulator of chromatin, subfamily a, member 4	--	1.577	10	Nucleus	transcription regulator			6597	20586	171379
SMC3	structural maintenance of chromosomes 3	--			Nucleus	other			9126	13006	29486
SNAP23	synaptosomal-associated protein, 23kDa	--	1.430	3	Plasma Membrane	transporter			8773	20619	64630
SNCA	synuclein, alpha (non A4 component of amyloid precursor)	--			Cytoplasm	other	diagnosis,disease progression,prognosis		6622	20617	29219
SNRK	SNF related kinase	--			Cytoplasm	kinase			54861	20623	170837
SNRPB2	small nuclear ribonucleoprotein polypeptide B	--	1.391	1	Nucleus	other			6629	20639	362223
Sod	--	--		4	Cytoplasm	group
SOD1	superoxide dismutase 1, soluble	--	-1.490	4	Cytoplasm	enzyme	unspecified application		6647	20655	24786
Sos	--	--		6	Cytoplasm	group
SOX11	SRY (sex determining region Y)-box 11	--			Nucleus	transcription regulator			6664	20666	84046
SPINK5	serine peptidase inhibitor, Kazal type 5	--	-2.047	6	Extracellular Space	other	unspecified application		11005	72432	361319|100910851
SRC (family)	--	--		12	Cytoplasm	group		ponatinib
SREBF1	sterol regulatory element binding transcription factor 1	--			Nucleus	transcription regulator	diagnosis		6720	20787	78968
SRF	serum response factor (c-fos serum response element-binding transcription factor)	--			Nucleus	transcription regulator			6722	20807	501099
SRSF11	serine/arginine-rich splicing factor 11	--		8	Nucleus	other			9295	69207	502603
SSBP1	single-stranded DNA binding protein 1, mitochondrial	--	1.427	5	Cytoplasm	other			6742	381760	54304
STARD10	StAR-related lipid transfer (START) domain containing 10	--		11	Cytoplasm	other			10809	56018	293150
STAT1	signal transducer and activator of transcription 1, 91kDa	--	1.702	10	Nucleus	transcription regulator	diagnosis,efficacy,prognosis,response to therapy		6772	20846	25124
STAT5a/b	--	--		2	Cytoplasm	group	diagnosis,efficacy,prognosis
STAU1	staufen double-stranded RNA binding protein 1	--	1.323	1	Cytoplasm	transporter			6780	20853	84496
STC1	stanniocalcin 1	--		12	Extracellular Space	kinase	diagnosis		6781	20855	81801
STK38	serine/threonine kinase 38	--	-1.589	4	Nucleus	kinase			11329	106504
STMN1	stathmin 1	--	1.692	4	Cytoplasm	other	efficacy		3925	16765	29332
STRAP	serine/threonine kinase receptor associated protein	--	1.626	1	Plasma Membrane	other			11171	20901	297699
streptozocin	--	--			Other	chemical drug
STRN3	striatin, calmodulin binding protein 3	--	1.320	5	Nucleus	transcription regulator			29966	94186	114520
SUB1	SUB1 homolog (S. cerevisiae)	--	-1.680	1	Nucleus	transcription regulator			10923	20024	192269
SUGP1	SURP and G patch domain containing 1	--		8	Nucleus	other			57794	70616	290666
sulindac	--	--			Other	chemical drug
SYK/ZAP	--	--		3	Cytoplasm	group
Syntaxin	--	--		3	Other	group
TAF9	TAF9 RNA polymerase II, TATA box binding protein (TBP)-associated factor, 32kDa	--			Nucleus	transcription regulator			6880	108143	373541
TAF10	TAF10 RNA polymerase II, TATA box binding protein (TBP)-associated factor, 30kDa	--			Nucleus	transcription regulator			6881	24075	293345
TAF12	TAF12 RNA polymerase II, TATA box binding protein (TBP)-associated factor, 20kDa	--			Nucleus	transcription regulator			6883	66464	682902
TALDO1	transaldolase 1	--	1.515	13	Cytoplasm	enzyme			6888	21351	83688
tanespimycin	--	--			Other	chemical drug
targinine	--	--			Other	chemical drug
TCF	--	--		3	Other	group
Tcf 1/3/4	--	--			Nucleus	group
TCF7L2	transcription factor 7-like 2 (T-cell specific, HMG-box)	--			Nucleus	transcription regulator	efficacy		6934	21416	679869
TCR	--	--		5	Plasma Membrane	complex
TERC	telomerase RNA component	--			Other	other			7012	21748
TES	testis derived transcript (3 LIM domains)	--	1.420	3	Plasma Membrane	other			26136	21753	500040
testosterone	--	--			Other	chemical - endogenous mammalian	diagnosis,efficacy,prognosis,safety
TET2	tet methylcytosine dioxygenase 2	--			Other	other			54790	214133	310859
TFAP2A	transcription factor AP-2 alpha (activating enhancer binding protein 2 alpha)	--			Nucleus	transcription regulator	diagnosis,prognosis		7020	21418	306862
Tgf beta	--	--		3	Extracellular Space	group	diagnosis,efficacy,prognosis,response to therapy,safety
TGFB1	transforming growth factor, beta 1	--			Extracellular Space	growth factor	diagnosis,efficacy,prognosis,safety,unspecified application		7040	21803	59086
TGM2	transglutaminase 2	--			Cytoplasm	enzyme			7052	21817	56083
THAP11	THAP domain containing 11	--	1.363	8	Nucleus	other			57215	59016	307806
THBS1	thrombospondin 1	--	-2.031	5	Extracellular Space	other	diagnosis,efficacy		7057	21825	445442
thioacetamide	--	--			Other	chemical toxicant
thioinosine	--	--			Other	chemical toxicant
THOC2	THO complex 2	--	1.543	9	Nucleus	other			57187	331401	313308
THOC3	THO complex 3	--		9	Nucleus	other			84321	73666	290519
THOC7	THO complex 7 homolog (Drosophila)	--		9	Nucleus	other			80145	66231	305714
THY1	Thy-1 cell surface antigen	--	1.569	3,13	Plasma Membrane	other	diagnosis,disease progression		7070	21838	24832
thymidine kinase	--	--		10	Other	group
TLN1	talin 1	--	2.019	3	Plasma Membrane	other	unspecified application		7094	21894	313494
TMA16	translation machinery associated 16 homolog (S. cerevisiae)	--		11	Nucleus	other			55319	66282	290686
TMED10	transmembrane emp24-like trafficking protein 10 (yeast)	--	1.566	5	Cytoplasm	transporter			10972	100042773|68581	84599
TMEM39B	transmembrane protein 39B	--	1.412	7	Cytoplasm	other			55116	230770	362608
TNF	tumor necrosis factor	--		13	Extracellular Space	cytokine	diagnosis,disease progression,efficacy,prognosis,response to therapy,safety,unspecified application	adalimumab, etanercept, infliximab, certolizumab, golimumab, infliximab/methotrexate, dexamethasone/thalidomide, dexamethasone/pomalidomide, cyclophosphamide/dexamethasone/thalidomide, golimumab/methotrexate, bortezomib/dexamethasone/thalidomide, rituximab/thalidomide, bortezomib/thalidomide, prednisone/thalidomide, pomalidomide, thalidomide	7124	21926	24835
Tnf (family)	--	--		6	Other	group
TNFSF10	tumor necrosis factor (ligand) superfamily, member 10	--			Extracellular Space	cytokine	efficacy		8743	22035	246775
TO-901317	--	--			Other	chemical reagent
TP53	tumor protein p53	--		11	Nucleus	transcription regulator	diagnosis,disease progression,efficacy,prognosis,response to therapy,unspecified application		7157	22059	24842
TP73	tumor protein p73	--			Nucleus	transcription regulator	diagnosis,efficacy,safety		7161	22062	362675
TPTE2	transmembrane phosphoinositide 3-phosphatase and tensin homolog 2	--	1.352	6	Cytoplasm	phosphatase			93492	234129	364629
trans-4-phenylbut-3-en-2-one	--	--			Other	chemical toxicant
trans-hydroxytamoxifen	--	--			Other	chemical drug
TRAP1	TNF receptor-associated protein 1	--	-1.481	2	Cytoplasm	enzyme			10131	68015	287069
tretinoin	--	--			Other	chemical - endogenous mammalian
triacylglycerol	--	--			Other	chemical - endogenous mammalian	efficacy,safety
triamterene	--	--			Other	chemical drug
trichostatin A	--	--			Other	chemical drug
TRIM10	tripartite motif containing 10	--	1.337	2	Cytoplasm	other			10107	19824	294210
TRIM25	tripartite motif containing 25	--	1.457	4	Cytoplasm	transcription regulator			7706	217069	494338
TRIM47	tripartite motif containing 47	--	1.316	7	Cytoplasm	other			91107	217333	690374
troglitazone	--	--			Other	chemical drug
trypsin	--	--		6	Extracellular Space	group
tubulin (complex)	--	--		12	Cytoplasm	complex	efficacy,response to therapy	trastuzumab emtansine
TXN2	thioredoxin 2	--			Cytoplasm	enzyme			25828	56551	79462
TXNDC5	thioredoxin domain containing 5 (endoplasmic reticulum)	--	1.350	9	Cytoplasm	enzyme			81567	105245	100362805
TXNDC11	thioredoxin domain containing 11	--		8	Cytoplasm	enzyme			51061	106200	302899
UBA5	ubiquitin-like modifier activating enzyme 5	--		7	Cytoplasm	enzyme			79876	66663	300968
UBC	ubiquitin C	--		7,8,9	Cytoplasm	enzyme			7316	22190	50522
Ubiquitin	--	--		4	Cytoplasm	group
USP4	ubiquitin specific peptidase 4 (proto-oncogene)	--		7	Nucleus	peptidase			7375	22258	290864
USP13	ubiquitin specific peptidase 13 (isopeptidase T-3)	--			Other	peptidase	unspecified application		8975	72607	310306
valproic acid	--	--			Other	chemical drug
vancomycin	--	--			Other	chemical drug
VCPIP1	valosin containing protein (p97)/p47 complex interacting protein 1	--		7	Cytoplasm	peptidase			80124	70675	286761
VDAC3	voltage-dependent anion channel 3	--	1.374	5	Cytoplasm	ion channel			7419	22335	83532
Vegf	--	--		12	Extracellular Space	group	diagnosis,disease progression,efficacy,prognosis,response to therapy,unspecified application
VIPAS39	VPS33B interacting protein, apical-basolateral polarity regulator, spe-39 homolog	--			Plasma Membrane	other			63894	104799	681989
VLDL	--	--			Plasma Membrane	complex
VPS26A	vacuolar protein sorting 26 homolog A (S. pombe)	--			Cytoplasm	transporter			9559	30930	361846
VPS33A	vacuolar protein sorting 33 homolog A (S. cerevisiae)	--	-1.458	11	Cytoplasm	transporter			65082	77573	65081
VWF	von Willebrand factor	--			Extracellular Space	other	diagnosis,efficacy,prognosis	F8	7450	22371	116669
WDR82	WD repeat domain 82	--	1.390	9	Nucleus	other			80335	77305	686295
XBP1	X-box binding protein 1	--			Nucleus	transcription regulator			7494	22433	289754
YIF1B	Yip1 interacting factor homolog B (S. cerevisiae)	--	-1.521	8	Other	other			90522	77254	292768
YIPF5	Yip1 domain family, member 5	--		8	Other	other			81555	67180	361315
YWHAB	tyrosine 3-monooxygenase/tryptophan 5-monooxygenase activation protein, beta	--	1.319	1	Cytoplasm	transcription regulator			7529	54401	56011
YWHAH	tyrosine 3-monooxygenase/tryptophan 5-monooxygenase activation protein, eta	--	1.354	1	Cytoplasm	transcription regulator	unspecified application		7533	22629	25576
YWHAZ	tyrosine 3-monooxygenase/tryptophan 5-monooxygenase activation protein, zeta	--	1.876	1	Cytoplasm	enzyme	diagnosis		7534	22631	25578
YY1	YY1 transcription factor	--			Nucleus	transcription regulator			7528	22632	24919
ZBTB9	zinc finger and BTB domain containing 9	--		8	Nucleus	other			221504	474156	294289
ZBTB7A	zinc finger and BTB domain containing 7A	--			Nucleus	transcription regulator			51341	16969	117107
ZEB1	zinc finger E-box binding homeobox 1	--			Nucleus	transcription regulator			6935	21417	25705
zonisamide	--	--			Other	chemical drug
